# Supplementary material for: Female Behaviour Drives Expression and Evolution of Gustatory Receptors in Butterflies
Source: PubMed Central journal article supplement (PMC3732137; doi:10.1371/journal.pgen.1003620), 2013-07-11

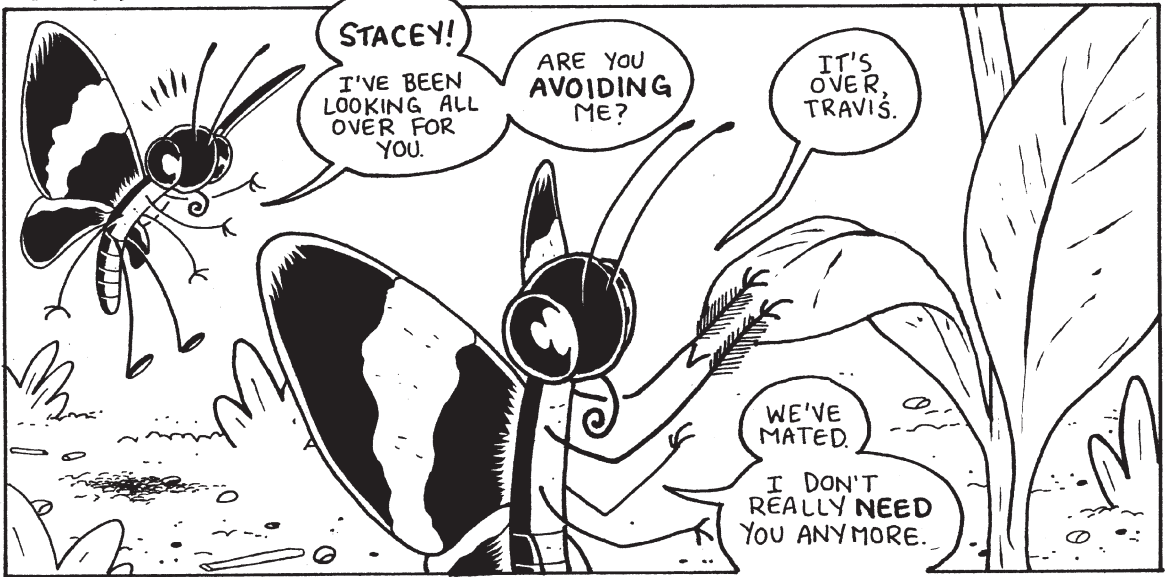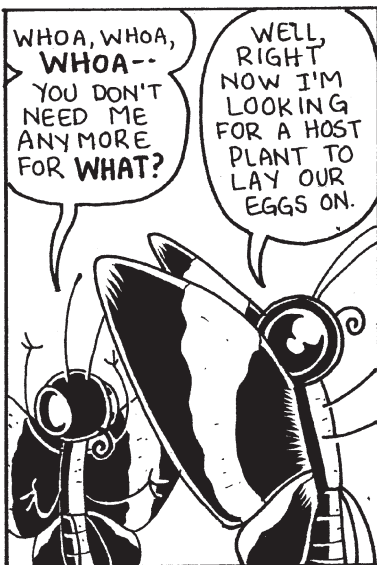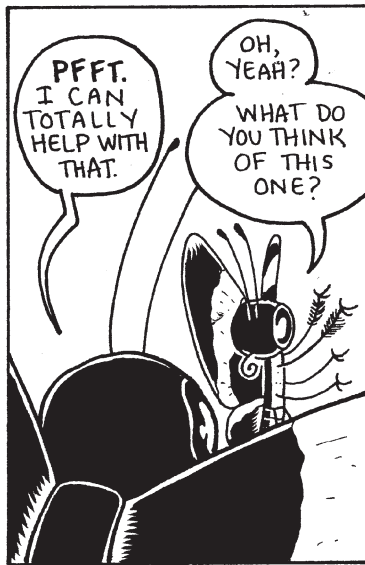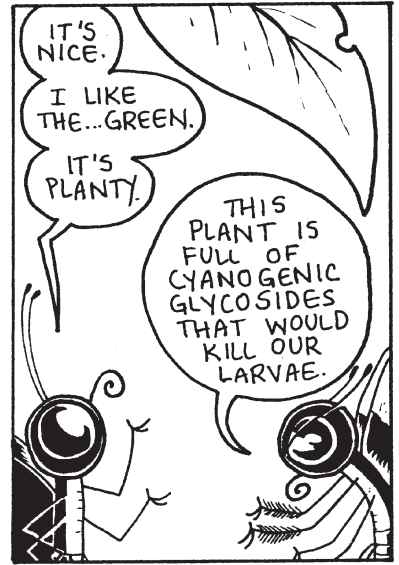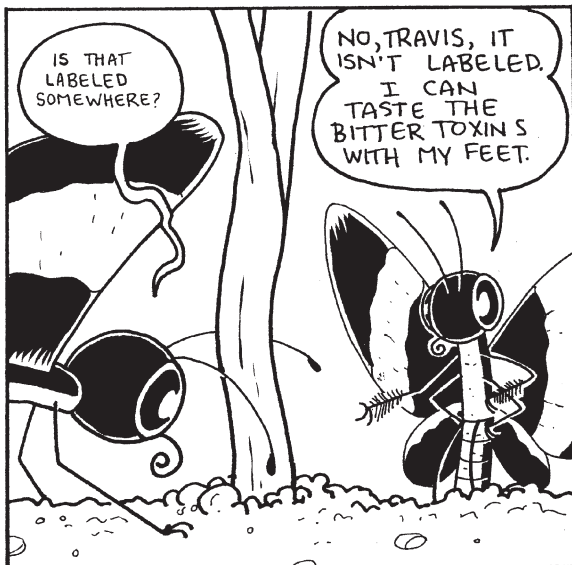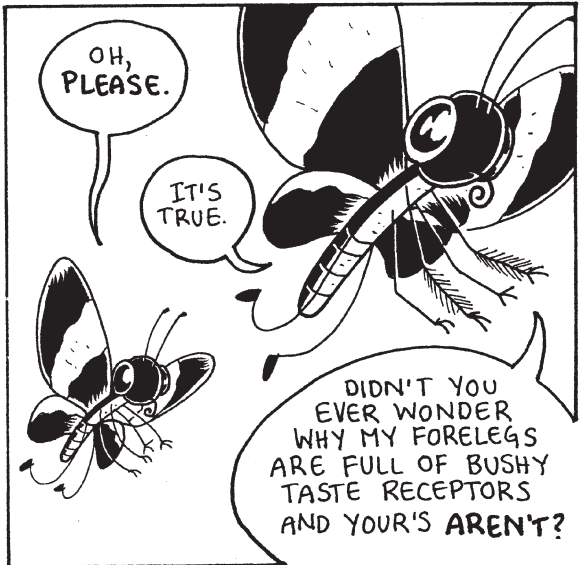

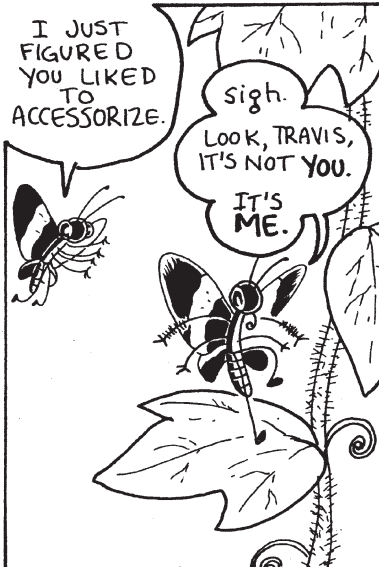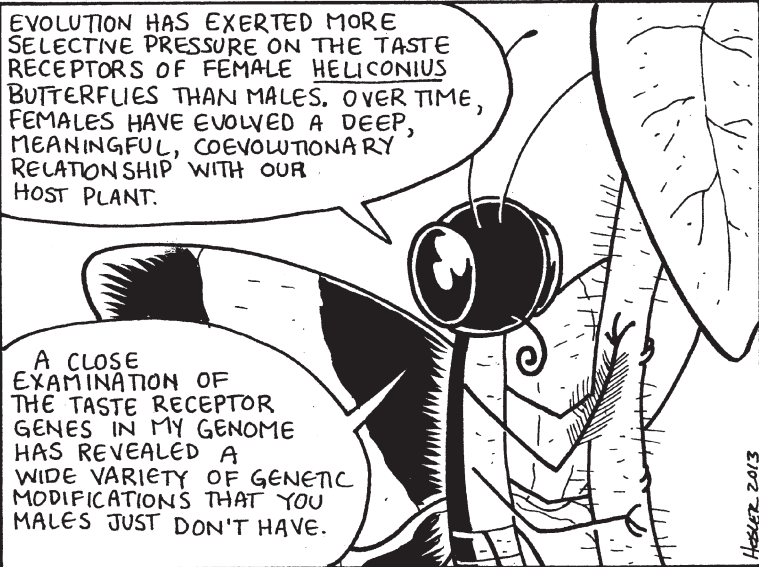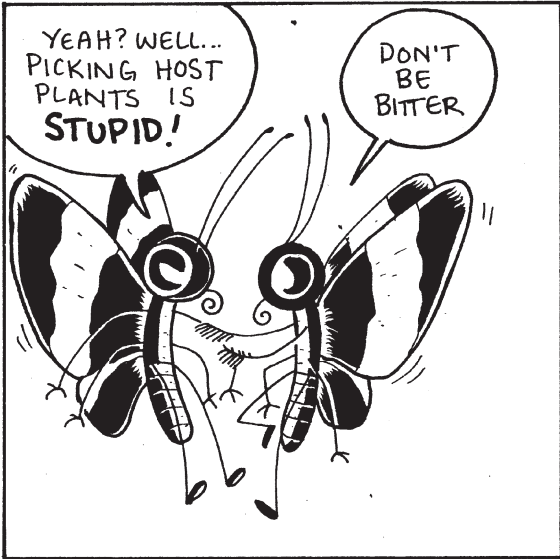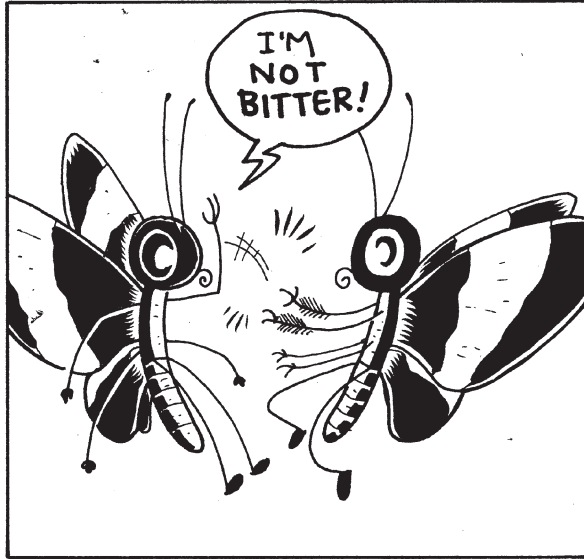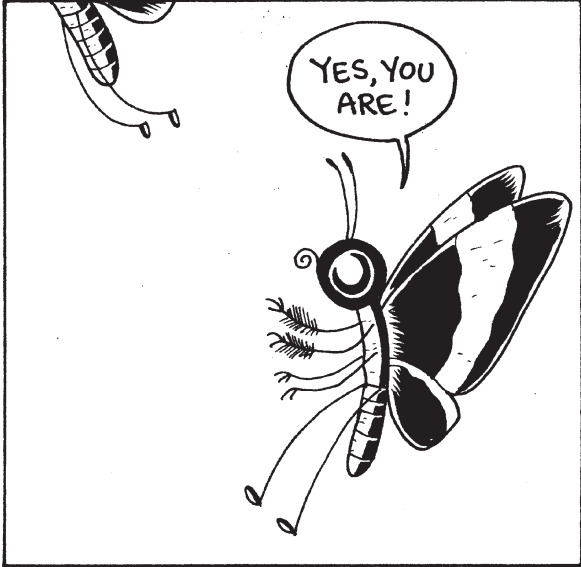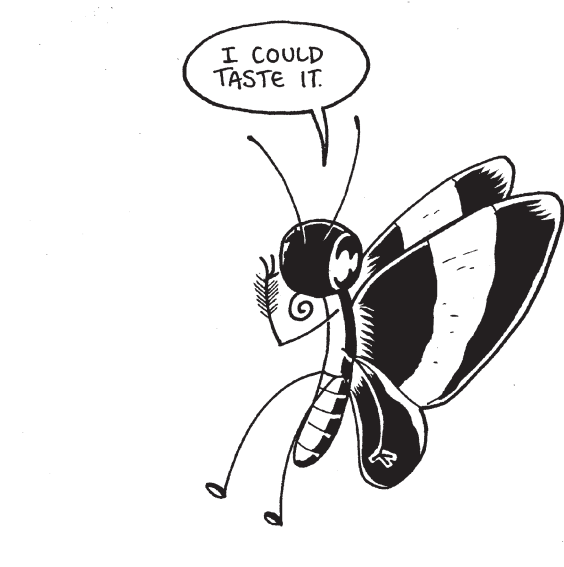

Supplement: pgen.1003620.s001.pdf [file pgen.1003620.s001.pdf]
