# Supplementary material for: Female Behaviour Drives Expression and Evolution of Gustatory Receptors in Butterflies
Source: PLoS Genet. 2013 Jul 11;9(7):e1003620. doi: 10.1371/journal.pgen.1003620 (PMC3732137; doi:10.1371/journal.pgen.1003620)
Supplement: Table S5 — CNVs in H. melpomene and H. cydno gustatory receptors. (XLS) [file pgen.1003620.s006.xls]

## Sheet: non-conserved_Gr_Hmel
GR gene	Scaffold	GR start	Gr end	Individual	Indel type	Indel depth	Indel start	Indel end	Size	CNV	noCNV
HmGr10	HE670771	218820	223034	melPAN1	No indel
HmGr10	HE670771	218820	223034	ag09-108	duplication	2.77122	216201	221200	4999
HmGr10	HE670771	218820	223034	ag09-122	duplication	2.28493	216201	221100	4899
HmGr10	HE670771	218820	223034	ag11-569	duplication	2.82549	216201	226200	9999
HmGr10	HE670771	218820	223034	ag11-572	No indel				0
HmGr10	HE670771	218820	223034	am09-216	No indel				0
HmGr10	HE670771	218820	223034	am11-160	No indel				0
HmGr10	HE670771	218820	223034	am11-293	No indel				0
HmGr10	HE670771	218820	223034	am11-48	duplication	2.16312	217901	220700	2799
HmGr10	HE670771	218820	223034	ros2071	No indel				0
HmGr10	HE670771	218820	223034	ros531	No indel				0
HmGr10	HE670771	218820	223034	ros533	No indel				0
HmGr10	HE670771	218820	223034	ros546	No indel				0	1
HmGr11	HE671947	10383	12383	melPAN1	No indel
HmGr11	HE671947	10383	12383	ag09-108	duplication	3.42276	9101	16600	7499
HmGr11	HE671947	10383	12383	ag09-122	duplication	4.54905	9001	16600	7599
HmGr11	HE671947	10383	12383	ag11-569	No indel				0
HmGr11	HE671947	10383	12383	ag11-572	duplication	4.41129	12301	16000	3699
HmGr11	HE671947	10383	12383	am09-216	duplication	3.17451	9001	16600	7599
HmGr11	HE671947	10383	12383	am11-160	duplication	8.15175	9001	16000	6999
HmGr11	HE671947	10383	12383	am11-293	duplication	5.96705	7501	16600	9099
HmGr11	HE671947	10383	12383	am11-48	No indel				0
HmGr11	HE671947	10383	12383	ros2071	No indel				0
HmGr11	HE671947	10383	12383	ros531	No indel				0
HmGr11	HE671947	10383	12383	ros533	No indel				0
HmGr11	HE671947	10383	12383	ros546	No indel				0	1
HmGr12	HE671947	4015	6290	melPAN1	No indel
HmGr12	HE671947	4015	6290	ag09-108	No indel				0
HmGr12	HE671947	4015	6290	ag09-122	duplication	5.02643	1	4400	4399
HmGr12	HE671947	4015	6290	ag11-569	duplication	2.82067	1801	4400	2599
HmGr12	HE671947	4015	6290	ag11-572	No indel				0
HmGr12	HE671947	4015	6290	am09-216	No indel				0
HmGr12	HE671947	4015	6290	am11-160	duplication	6.17124	1	6500	6499
HmGr12	HE671947	4015	6290	am11-293	duplication	5.08035	1	6500	6499
HmGr12	HE671947	4015	6290	am11-48	No indel				0
HmGr12	HE671947	4015	6290	ros2071	No indel				0
HmGr12	HE671947	4015	6290	ros531	No indel				0
HmGr12	HE671947	4015	6290	ros533	No indel				0
HmGr12	HE671947	4015	6290	ros546	No indel				0	1
HmGr13	HE672041	37002	40191	melPAN1	No indel
HmGr13	HE672041	37002	40191	ag09-108	No indel				0
HmGr13	HE672041	37002	40191	ag09-122	No indel				0
HmGr13	HE672041	37002	40191	ag11-569	No indel				0
HmGr13	HE672041	37002	40191	ag11-572	No indel				0
HmGr13	HE672041	37002	40191	am09-216	No indel				0
HmGr13	HE672041	37002	40191	am11-160	No indel				0
HmGr13	HE672041	37002	40191	am11-293	No indel				0
HmGr13	HE672041	37002	40191	am11-48	No indel				0
HmGr13	HE672041	37002	40191	ros2071	No indel				0
HmGr13	HE672041	37002	40191	ros531	No indel				0
HmGr13	HE672041	37002	40191	ros533	No indel				0
HmGr13	HE672041	37002	40191	ros546	No indel				0		1
HmGr14	HE671444	4830	8276	melPAN1	No indel
HmGr14	HE671444	4830	8276	ag09-108	No indel				0
HmGr14	HE671444	4830	8276	ag09-122	duplication	3.41071	6601	11600	4999
HmGr14	HE671444	4830	8276	ag11-569	No indel				0
HmGr14	HE671444	4830	8276	ag11-572	No indel				0
HmGr14	HE671444	4830	8276	am09-216	duplication	2.65639	8201	11000	2799
HmGr14	HE671444	4830	8276	am11-160	duplication	5.09129	6601	11600	4999
HmGr14	HE671444	4830	8276	am11-293	duplication	5.26411	6701	11000	4299
HmGr14	HE671444	4830	8276	am11-48	No indel				0
HmGr14	HE671444	4830	8276	ros2071	No indel				0
HmGr14	HE671444	4830	8276	ros531	No indel				0
HmGr14	HE671444	4830	8276	ros533	No indel				0
HmGr14	HE671444	4830	8276	ros546	deletion	0.489255	1	15400	15399	1
HmGr15	HE670201	22477	24325	melPAN1	No indel
HmGr15	HE670201	22477	24325	ag09-108	No indel				0
HmGr15	HE670201	22477	24325	ag09-122	No indel				0
HmGr15	HE670201	22477	24325	ag11-569	No indel				0
HmGr15	HE670201	22477	24325	ag11-572	No indel				0
HmGr15	HE670201	22477	24325	am09-216	No indel				0
HmGr15	HE670201	22477	24325	am11-160	No indel				0
HmGr15	HE670201	22477	24325	am11-293	No indel				0
HmGr15	HE670201	22477	24325	am11-48	No indel				0
HmGr15	HE670201	22477	24325	ros2071	No indel				0
HmGr15	HE670201	22477	24325	ros531	No indel
HmGr15	HE670201	22477	24325	ros533	No indel
HmGr15	HE670201	22477	24325	ros546	No indel						1
HmGr16	HE670771	238429	243240	melPAN1	No indel
HmGr16	HE670771	238429	243240	ag09-108	deletion	0.463764	242401	246100	3699
HmGr16	HE670771	238429	243240	ag09-122	deletion	0.369014	237101	248700	11599
HmGr16	HE670771	238429	243240	ag11-569	deletion	0.281519	237101	241700	4599
HmGr16	HE670771	238429	243240	ag11-572	deletion	0.21234	237101	239200	2099
HmGr16	HE670771	238429	243240	am09-216	deletion	0.0565651	237201	238800	1599
HmGr16	HE670771	238429	243240	am09-216	deletion	0.374521	243001	248600	5599
HmGr16	HE670771	238429	243240	am11-160	deletion	0.478281	237101	247900	10799
HmGr16	HE670771	238429	243240	am11-293	deletion	0.12052	237101	238700	1599
HmGr16	HE670771	238429	243240	am11-48	deletion	0.59884	237101	241200	4099
HmGr16	HE670771	238429	243240	ros2071	No indel				0
HmGr16	HE670771	238429	243240	ros531	No indel				0
HmGr16	HE670771	238429	243240	ros533	No indel				0
HmGr16	HE670771	238429	243240	ros546	No indel				0	1
HmGr17	HE671576	89612	91935	melPAN1	No indel
HmGr17	HE671576	89612	91935	ag09-108	No indel				0
HmGr17	HE671576	89612	91935	ag09-122	No indel				0
HmGr17	HE671576	89612	91935	ag11-569	No indel				0
HmGr17	HE671576	89612	91935	ag11-572	No indel				0
HmGr17	HE671576	89612	91935	am09-216	No indel				0
HmGr17	HE671576	89612	91935	am11-160	No indel				0
HmGr17	HE671576	89612	91935	am11-293	No indel				0
HmGr17	HE671576	89612	91935	am11-48	No indel				0
HmGr17	HE671576	89612	91935	ros2071	No indel				0
HmGr17	HE671576	89612	91935	ros531	No indel				0
HmGr17	HE671576	89612	91935	ros533	No indel				0
HmGr17	HE671576	89612	91935	ros546	No indel				0		1
HmGr18	HE671576	78385	82256	melPAN1	No indel
HmGr18	HE671576	78385	82256	ag09-108	No indel				0
HmGr18	HE671576	78385	82256	ag09-122	No indel				0
HmGr18	HE671576	78385	82256	ag11-569	No indel				0
HmGr18	HE671576	78385	82256	ag11-572	No indel				0
HmGr18	HE671576	78385	82256	am09-216	No indel				0
HmGr18	HE671576	78385	82256	am11-160	No indel				0
HmGr18	HE671576	78385	82256	am11-293	No indel				0
HmGr18	HE671576	78385	82256	am11-48	No indel				0
HmGr18	HE671576	78385	82256	ros2071	No indel				0
HmGr18	HE671576	78385	82256	ros531	No indel				0
HmGr18	HE671576	78385	82256	ros533	No indel				0
HmGr18	HE671576	78385	82256	ros546	No indel				0		1
HmGr22	HE671488	472124	473341	melPAN1	No indel
HmGr22	HE671488	472124	473341	ag09-108	No indel				0
HmGr22	HE671488	472124	473341	ag09-122	No indel				0
HmGr22	HE671488	472124	473341	ag11-569	No indel				0
HmGr22	HE671488	472124	473341	ag11-572	No indel				0
HmGr22	HE671488	472124	473341	am09-216	No indel				0
HmGr22	HE671488	472124	473341	am11-160	No indel				0
HmGr22	HE671488	472124	473341	am11-293	No indel				0
HmGr22	HE671488	472124	473341	am11-48	No indel				0
HmGr22	HE671488	472124	473341	ros2071	No indel				0
HmGr22	HE671488	472124	473341	ros531	No indel				0
HmGr22	HE671488	472124	473341	ros533	No indel				0
HmGr22	HE671488	472124	473341	ros546	No indel				0		1
HmGr23	HE670235	29007	30170	melPAN1	No indel
HmGr23	HE670235	29007	30170	ag09-108	No indel				0
HmGr23	HE670235	29007	30170	ag09-122	No indel				0
HmGr23	HE670235	29007	30170	ag11-569	duplication	2.37658	28701	30500	1799
HmGr23	HE670235	29007	30170	ag11-572	No indel				0
HmGr23	HE670235	29007	30170	am09-216	duplication	2.07122	28701	30500	1799
HmGr23	HE670235	29007	30170	am11-160	No indel				0
HmGr23	HE670235	29007	30170	am11-293	No indel				0
HmGr23	HE670235	29007	30170	am11-48	No indel				0
HmGr23	HE670235	29007	30170	ros2071	No indel				0
HmGr23	HE670235	29007	30170	ros531	No indel				0
HmGr23	HE670235	29007	30170	ros533	No indel				0
HmGr23	HE670235	29007	30170	ros546	No indel				0	1
HmGr24	HE671488	464274	465482	melPAN1	No indel
HmGr24	HE671488	464274	465482	ag09-108	No indel				0
HmGr24	HE671488	464274	465482	ag09-122	No indel				0
HmGr24	HE671488	464274	465482	ag11-569	No indel				0
HmGr24	HE671488	464274	465482	ag11-572	No indel				0
HmGr24	HE671488	464274	465482	am09-216	No indel				0
HmGr24	HE671488	464274	465482	am11-160	No indel				0
HmGr24	HE671488	464274	465482	am11-293	No indel				0
HmGr24	HE671488	464274	465482	am11-48	No indel				0
HmGr24	HE671488	464274	465482	ros2071	No indel				0
HmGr24	HE671488	464274	465482	ros531	No indel				0
HmGr24	HE671488	464274	465482	ros533	No indel				0
HmGr24	HE671488	464274	465482	ros546	No indel				0		1
HmGr25	HE671488	461588	462808	melPAN1	No indel
HmGr25	HE671488	461588	462808	ag09-108	duplication	2.52175	458701	461800	3099
HmGr25	HE671488	461588	462808	ag09-122	duplication	2.20453	458501	461800	3299
HmGr25	HE671488	461588	462808	ag11-569	No indel				0
HmGr25	HE671488	461588	462808	ag11-572	duplication	2.08915	454801	461800	6999
HmGr25	HE671488	461588	462808	am09-216	No indel				0
HmGr25	HE671488	461588	462808	am11-160	No indel				0
HmGr25	HE671488	461588	462808	am11-293	duplication	2.21886	454801	463100	8299
HmGr25	HE671488	461588	462808	am11-48	duplication	2.2992	458501	461800	3299
HmGr25	HE671488	461588	462808	ros2071	duplication	3.29932	458401	461700	3299
HmGr25	HE671488	461588	462808	ros531	No indel				0
HmGr25	HE671488	461588	462808	ros533	No indel				0
HmGr25	HE671488	461588	462808	ros546	No indel				0	1
HmGr26	HE671326	2786	4998	ag09-108	No indel				0
HmGr26	HE671326	2786	4998	ag09-122	duplication	2.29991	1	7200	7199
HmGr26	HE671326	2786	4998	ag11-569	No indel				0
HmGr26	HE671326	2786	4998	ag11-572	No indel				0
HmGr26	HE671326	2786	4998	am09-216	No indel				0
HmGr26	HE671326	2786	4998	am11-160	No indel				0
HmGr26	HE671326	2786	4998	am11-293	No indel				0
HmGr26	HE671326	2786	4998	am11-48	No indel				0
HmGr26	HE671326	2786	4998	ros2071	No indel				0
HmGr26	HE671326	2786	4998	ros531	No indel				0
HmGr26	HE671326	2786	4998	ros533	No indel				0
HmGr26	HE671326	2786	4998	ros546	No indel				0	1
HmGr27	HE670885	26433	28408	melPAN1	No indel
HmGr27	HE670885	26433	28408	ag09-108	No indel				0
HmGr27	HE670885	26433	28408	ag09-122	No indel				0
HmGr27	HE670885	26433	28408	ag11-569	No indel				0
HmGr27	HE670885	26433	28408	ag11-572	No indel				0
HmGr27	HE670885	26433	28408	am09-216	No indel				0
HmGr27	HE670885	26433	28408	am11-160	duplication	4.50816	22401	33000	10599
HmGr27	HE670885	26433	28408	am11-293	No indel				0
HmGr27	HE670885	26433	28408	am11-48	No indel				0
HmGr27	HE670885	26433	28408	ros2071	No indel				0
HmGr27	HE670885	26433	28408	ros531	No indel				0
HmGr27	HE670885	26433	28408	ros533	No indel				0
HmGr27	HE670885	26433	28408	ros546	No indel				0	1
HmGr28	HE669805	1372	2687	melPAN1	No indel
HmGr28	HE669805	1372	2687	ag09-108	No indel				0
HmGr28	HE669805	1372	2687	ag09-122	No indel				0
HmGr28	HE669805	1372	2687	ag11-569	No indel				0
HmGr28	HE669805	1372	2687	ag11-572	No indel				0
HmGr28	HE669805	1372	2687	am09-216	No indel				0
HmGr28	HE669805	1372	2687	am11-160	No indel				0
HmGr28	HE669805	1372	2687	am11-293	No indel				0
HmGr28	HE669805	1372	2687	am11-48	No indel				0
HmGr28	HE669805	1372	2687	ros2071	No indel				0
HmGr28	HE669805	1372	2687	ros531	No indel				0
HmGr28	HE669805	1372	2687	ros533	No indel				0
HmGr28	HE669805	1372	2687	ros546	No indel				0		1
HmGr29	HE670607	251665	254347	melPAN1	No indel
HmGr29	HE670607	251665	254347	ag09-108	No indel				0
HmGr29	HE670607	251665	254347	ag09-122	No indel				0
HmGr29	HE670607	251665	254347	ag11-569	No indel				0
HmGr29	HE670607	251665	254347	ag11-572	No indel				0
HmGr29	HE670607	251665	254347	am09-216	No indel				0
HmGr29	HE670607	251665	254347	am11-160	No indel				0
HmGr29	HE670607	251665	254347	am11-293	No indel				0
HmGr29	HE670607	251665	254347	am11-48	No indel				0
HmGr29	HE670607	251665	254347	ros2071	No indel				0
HmGr29	HE670607	251665	254347	ros531	No indel				0
HmGr29	HE670607	251665	254347	ros533	No indel				0
HmGr29	HE670607	251665	254347	ros546	No indel				0		1
HmGr30	HE670607	245241	247379	melPAN1	No indel
HmGr30	HE670607	245241	247379	ag09-108	No indel				0
HmGr30	HE670607	245241	247379	ag09-122	No indel				0
HmGr30	HE670607	245241	247379	ag11-569	No indel				0
HmGr30	HE670607	245241	247379	ag11-572	No indel				0
HmGr30	HE670607	245241	247379	am09-216	No indel				0
HmGr30	HE670607	245241	247379	am11-160	No indel				0
HmGr30	HE670607	245241	247379	am11-293	No indel				0
HmGr30	HE670607	245241	247379	am11-48	No indel				0
HmGr30	HE670607	245241	247379	ros2071	No indel				0
HmGr30	HE670607	245241	247379	ros531	No indel				0
HmGr30	HE670607	245241	247379	ros533	No indel				0
HmGr30	HE670607	245241	247379	ros546	No indel				0		1
HmGr31	HE671844	4556	6597	melPAN1	No indel
HmGr31	HE671844	4556	6597	ag09-108	No indel				0
HmGr31	HE671844	4556	6597	ag09-122	No indel				0
HmGr31	HE671844	4556	6597	ag11-569	No indel				0
HmGr31	HE671844	4556	6597	ag11-572	No indel				0
HmGr31	HE671844	4556	6597	am09-216	No indel				0
HmGr31	HE671844	4556	6597	am11-160	No indel				0
HmGr31	HE671844	4556	6597	am11-293	No indel				0
HmGr31	HE671844	4556	6597	am11-48	No indel				0
HmGr31	HE671844	4556	6597	ros2071	No indel				0
HmGr31	HE671844	4556	6597	ros531	No indel				0
HmGr31	HE671844	4556	6597	ros533	No indel				0
HmGr31	HE671844	4556	6597	ros546	No indel				0		1
HmGr32	HE671160	44889	46587	melPAN1	No indel
HmGr32	HE671160	44889	46587	ag09-108	No indel				0
HmGr32	HE671160	44889	46587	ag09-122	No indel				0
HmGr32	HE671160	44889	46587	ag11-569	No indel				0
HmGr32	HE671160	44889	46587	ag11-572	No indel				0
HmGr32	HE671160	44889	46587	am09-216	No indel				0
HmGr32	HE671160	44889	46587	am11-160	No indel				0
HmGr32	HE671160	44889	46587	am11-293	duplication	2.46665	40101	47800	7699
HmGr32	HE671160	44889	46587	am11-48	No indel				0
HmGr32	HE671160	44889	46587	ros2071	No indel				0
HmGr32	HE671160	44889	46587	ros531	No indel				0
HmGr32	HE671160	44889	46587	ros533	No indel				0
HmGr32	HE671160	44889	46587	ros546	No indel				0	1
HmGr33	HE671160	41716	44178	melPAN1	No indel
HmGr33	HE671160	41716	44178	ag09-108	No indel				0
HmGr33	HE671160	41716	44178	ag09-122	No indel				0
HmGr33	HE671160	41716	44178	ag11-569	No indel				0
HmGr33	HE671160	41716	44178	ag11-572	No indel				0
HmGr33	HE671160	41716	44178	am09-216	No indel				0
HmGr33	HE671160	41716	44178	am11-160	No indel				0
HmGr33	HE671160	41716	44178	am11-293	duplication	2.46665	40101	47800	7699
HmGr33	HE671160	41716	44178	am11-48	No indel				0
HmGr33	HE671160	41716	44178	ros2071	No indel				0
HmGr33	HE671160	41716	44178	ros531	No indel				0
HmGr33	HE671160	41716	44178	ros533	No indel				0
HmGr33	HE671160	41716	44178	ros546	No indel				0	1
HmGr34	HE671947	53501	55638	melPAN1	No indel
HmGr34	HE671947	53501	55638	ag09-108	No indel				0
HmGr34	HE671947	53501	55638	ag09-122	No indel				0
HmGr34	HE671947	53501	55638	ag11-569	No indel				0
HmGr34	HE671947	53501	55638	ag11-572	No indel				0
HmGr34	HE671947	53501	55638	am09-216	No indel				0
HmGr34	HE671947	53501	55638	am11-160	No indel				0
HmGr34	HE671947	53501	55638	am11-293	No indel				0
HmGr34	HE671947	53501	55638	am11-48	No indel				0
HmGr34	HE671947	53501	55638	ros2071	duplication	2.3375	47201	56200	8999
HmGr34	HE671947	53501	55638	ros531	duplication	3.21988	48001	56100	8099
HmGr34	HE671947	53501	55638	ros533	No indel				0
HmGr34	HE671947	53501	55638	ros546	No indel				0	1
HmGr35	HE671947	20809	22523	melPAN1	No indel
HmGr35	HE671947	20809	22523	ag09-108	duplication	3.41597	18501	24200	5699
HmGr35	HE671947	20809	22523	ag09-122	duplication	4.5424	18501	25800	7299
HmGr35	HE671947	20809	22523	ag11-569	duplication	2.65682	18501	24200	5699
HmGr35	HE671947	20809	22523	ag11-572	duplication	3.25569	18501	24200	5699
HmGr35	HE671947	20809	22523	am09-216	duplication	3.00637	18501	24200	5699
HmGr35	HE671947	20809	22523	am11-160	duplication	8.40717	18501	24200	5699
HmGr35	HE671947	20809	22523	am11-293	duplication	8.19322	18501	24100	5599
HmGr35	HE671947	20809	22523	am11-48	No indel				0
HmGr35	HE671947	20809	22523	ros2071	duplication	3.06982	18501	23600	5099
HmGr35	HE671947	20809	22523	ros531	No indel				0
HmGr35	HE671947	20809	22523	ros533	No indel				0
HmGr35	HE671947	20809	22523	ros546	deletion	0.401169	21501	48100	26599	1
HmGr36	HE671326	2786	4998	melPAN1	No indel
HmGr36	HE671326	2786	4998	ag09-108	No indel				0
HmGr36	HE671326	2786	4998	ag09-122	duplication	2.29991	1	7200	7199
HmGr36	HE671326	2786	4998	ag11-569	No indel				0
HmGr36	HE671326	2786	4998	ag11-572	No indel				0
HmGr36	HE671326	2786	4998	am09-216	No indel				0
HmGr36	HE671326	2786	4998	am11-160	No indel				0
HmGr36	HE671326	2786	4998	am11-293	No indel				0
HmGr36	HE671326	2786	4998	am11-48	No indel				0
HmGr36	HE671326	2786	4998	ros2071	No indel				0
HmGr36	HE671326	2786	4998	ros531	No indel				0
HmGr36	HE671326	2786	4998	ros533	No indel				0
HmGr36	HE671326	2786	4998	ros546	No indel				0	1
HmGr37	HE671284	14458	17567	melPAN1	duplication	2.08576	13801	17300
HmGr37	HE671284	14458	17567	ag09-108	duplication	3.09416	7401	14500	7099
HmGr37	HE671284	14458	17567	ag09-122	duplication	3.54179	9201	16100	6899
HmGr37	HE671284	14458	17567	ag11-569	No indel				0
HmGr37	HE671284	14458	17567	ag11-572	No indel				0
HmGr37	HE671284	14458	17567	am09-216	duplication	2.6147	3201	14500	11299
HmGr37	HE671284	14458	17567	am11-160	duplication	5.11449	6801	18100	11299
HmGr37	HE671284	14458	17567	am11-293	deletion	0.228517	14401	15600	1199
HmGr37	HE671284	14458	17567	am11-48	deletion	0.32206	14301	15600	1299
HmGr37	HE671284	14458	17567	ros2071	No indel				0
HmGr37	HE671284	14458	17567	ros531	duplication	2.50115	4901	21200	16299
HmGr37	HE671284	14458	17567	ros533	No indel				0
HmGr37	HE671284	14458	17567	ros546	No indel				0			Excluding HmGr37 because of reference genome mapping
HmGr38	HE671947	34245	37090	ag09-108	duplication	2.21072	32201	44000	11799
HmGr38	HE671947	34245	37090	ag09-122	duplication	3.49072	32201	34900	2699
HmGr38	HE671947	34245	37090	ag09-122	duplication	4.49179	35401	39400	3999
HmGr38	HE671947	34245	37090	ag11-569	duplication	2.65973	35501	37400	1899
HmGr38	HE671947	34245	37090	ag11-572	No indel				0
HmGr38	HE671947	34245	37090	am09-216	duplication	2.86547	32201	39000	6799
HmGr38	HE671947	34245	37090	am11-160	duplication	5.68001	32201	34900	2699
HmGr38	HE671947	34245	37090	am11-160	duplication	4.68322	35501	44100	8599
HmGr38	HE671947	34245	37090	am11-293	duplication	4.93162	32201	34900	2699
HmGr38	HE671947	34245	37090	am11-293	duplication	4.12748	35201	44000	8799
HmGr38	HE671947	34245	37090	am11-48	No indel				0
HmGr38	HE671947	34245	37090	ros2071	duplication	2.69289	35701	37100	1399
HmGr38	HE671947	34245	37090	ros531	No indel				0
HmGr38	HE671947	34245	37090	ros533	No indel				0
HmGr38	HE671947	34245	37090	ros546	deletion	0.401169	21501	48100	26599	1
HmGr39	HE671947	14877	19576	melPAN1	duplication	2.57039	14501	16600
HmGr39	HE671947	14877	19576	melPAN1	deletion	0.03125	16601	18500
HmGr39	HE671947	14877	19576	melPAN1	No indel
HmGr39	HE671947	14877	19576	ag09-108	duplication	3.42276	9101	16600	7499
HmGr39	HE671947	14877	19576	ag09-108	deletion	0.00430827	16601	18500	1899
HmGr39	HE671947	14877	19576	ag09-108	duplication	3.41597	18501	24200	5699
HmGr39	HE671947	14877	19576	ag09-122	duplication	4.54905	9001	16600	7599
HmGr39	HE671947	14877	19576	ag09-122	deletion	0.00356376	16601	18500	1899
HmGr39	HE671947	14877	19576	ag09-122	duplication	4.5424	18501	25800	7299
HmGr39	HE671947	14877	19576	ag11-569	duplication	3.44156	12801	16200	3399
HmGr39	HE671947	14877	19576	ag11-569	deletion	0.123274	16201	18500	2299
HmGr39	HE671947	14877	19576	ag11-569	duplication	2.65682	18501	24200	5699
HmGr39	HE671947	14877	19576	ag11-572	duplication	4.41129	12301	16000	3699
HmGr39	HE671947	14877	19576	ag11-572	deletion	0.00582804	16601	18500	1899
HmGr39	HE671947	14877	19576	ag11-572	duplication	3.25569	18501	24200	5699
HmGr39	HE671947	14877	19576	am09-216	duplication	3.17451	9001	16600	7599
HmGr39	HE671947	14877	19576	am09-216	deletion	0.00539739	16601	18500	1899
HmGr39	HE671947	14877	19576	am09-216	duplication	3.00637	18501	24200	5699
HmGr39	HE671947	14877	19576	am11-160	duplication	8.15175	9001	16000	6999
HmGr39	HE671947	14877	19576	am11-160	deletion	0.115923	16201	18500	2299
HmGr39	HE671947	14877	19576	am11-160	duplication	8.40717	18501	24200	5699
HmGr39	HE671947	14877	19576	am11-293	duplication	5.96705	7501	16600	9099
HmGr39	HE671947	14877	19576	am11-293	deletion	0.00196472	16601	18500	1899
HmGr39	HE671947	14877	19576	am11-293	duplication	8.19322	18501	24100	5599
HmGr39	HE671947	14877	19576	am11-48	duplication	2.12506	12401	16000	3599
HmGr39	HE671947	14877	19576	am11-48	deletion	0.00463684	16601	18500	1899
HmGr39	HE671947	14877	19576	am11-48	No indel				0
HmGr39	HE671947	14877	19576	ros2071	deletion	0.0657862	16501	18500	1999
HmGr39	HE671947	14877	19576	ros2071	duplication	3.06982	18501	23600	5099
HmGr39	HE671947	14877	19576	ros531	duplication	3.37468	13001	16600	3599
HmGr39	HE671947	14877	19576	ros531	deletion	0.0391419	16601	18600	1999
HmGr39	HE671947	14877	19576	ros533	deletion	0.0987679	16401	18600	2199
HmGr39	HE671947	14877	19576	ros546	No indel				0			Excluding HmGr39 because of reference genome mapping
HmGr40	HE671947	48710	51325	melPAN1	No indel
HmGr40	HE671947	48710	51325	ag09-108	duplication	3.38967	46201	51400	5199
HmGr40	HE671947	48710	51325	ag09-122	duplication	4.89147	46301	52700	6399
HmGr40	HE671947	48710	51325	ag11-569	No indel				0
HmGr40	HE671947	48710	51325	ag11-572	duplication	3.00652	46301	51400	5099
HmGr40	HE671947	48710	51325	am09-216	duplication	2.98556	46301	51400	5099
HmGr40	HE671947	48710	51325	am11-160	duplication	7.2638	46301	52700	6399
HmGr40	HE671947	48710	51325	am11-293	duplication	5.15508	45401	52100	6699
HmGr40	HE671947	48710	51325	am11-48	No indel				0
HmGr40	HE671947	48710	51325	ros2071	duplication	2.3375	47201	56200	8999
HmGr40	HE671947	48710	51325	ros531	duplication	3.21988	48001	56100	8099
HmGr40	HE671947	48710	51325	ros533	No indel				0
HmGr40	HE671947	48710	51325	ros546	No indel				0	1
HmGr41	HE671284	2788	7958	melPAN1	No indel
HmGr41	HE671284	2788	7958	ag09-108	duplication	3.41813	1601	6500	4899
HmGr41	HE671284	2788	7958	ag09-108	duplication	3.09416	7401	14500	7099
HmGr41	HE671284	2788	7958	ag09-122	No indel				0
HmGr41	HE671284	2788	7958	ag11-569	No indel				0
HmGr41	HE671284	2788	7958	ag11-572	No indel				0
HmGr41	HE671284	2788	7958	am09-216	duplication	2.6147	3201	14500	11299
HmGr41	HE671284	2788	7958	am11-160	duplication	3.88763	1601	6500	4899
HmGr41	HE671284	2788	7958	am11-160	duplication	5.11449	6801	18100	11299
HmGr41	HE671284	2788	7958	am11-293	duplication	3.35032	1601	6500	4899
HmGr41	HE671284	2788	7958	am11-293	duplication	4.58908	6801	14400	7599
HmGr41	HE671284	2788	7958	am11-48	No indel				0
HmGr41	HE671284	2788	7958	ros2071	No indel				0
HmGr41	HE671284	2788	7958	ros531	duplication	2.50115	4901	21200	16299
HmGr41	HE671284	2788	7958	ros533	No indel				0
HmGr41	HE671284	2788	7958	ros546	No indel				0	1
HmGr42	HE672024	304703	307376	melPAN1	No indel
HmGr42	HE672024	304703	307376	ag09-108	No indel				0
HmGr42	HE672024	304703	307376	ag09-122	No indel				0
HmGr42	HE672024	304703	307376	ag11-569	No indel				0
HmGr42	HE672024	304703	307376	ag11-572	No indel				0
HmGr42	HE672024	304703	307376	am09-216	No indel				0
HmGr42	HE672024	304703	307376	am11-160	No indel				0
HmGr42	HE672024	304703	307376	am11-293	No indel				0
HmGr42	HE672024	304703	307376	am11-48	No indel				0
HmGr42	HE672024	304703	307376	ros2071	No indel				0
HmGr42	HE672024	304703	307376	ros531	No indel				0
HmGr42	HE672024	304703	307376	ros533	No indel				0
HmGr42	HE672024	304703	307376	ros546	No indel				0		1
HmGr43	HE671073	26556	29079	melPAN1	No indel
HmGr43	HE671073	26556	29079	ag09-108	No indel				0
HmGr43	HE671073	26556	29079	ag09-122	No indel				0
HmGr43	HE671073	26556	29079	ag11-569	No indel				0
HmGr43	HE671073	26556	29079	ag11-572	No indel				0
HmGr43	HE671073	26556	29079	am09-216	No indel				0
HmGr43	HE671073	26556	29079	am11-160	No indel				0
HmGr43	HE671073	26556	29079	am11-293	No indel				0
HmGr43	HE671073	26556	29079	am11-48	No indel				0
HmGr43	HE671073	26556	29079	ros2071	No indel				0
HmGr43	HE671073	26556	29079	ros531	No indel				0
HmGr43	HE671073	26556	29079	ros533	No indel				0
HmGr43	HE671073	26556	29079	ros546	No indel				0		1
HmGr47	HE671693	72587	75258	melPAN1	No indel
HmGr47	HE671693	72587	75258	ag09-108	No indel				0
HmGr47	HE671693	72587	75258	ag09-122	No indel				0
HmGr47	HE671693	72587	75258	ag11-569	No indel				0
HmGr47	HE671693	72587	75258	ag11-572	No indel				0
HmGr47	HE671693	72587	75258	am09-216	No indel				0
HmGr47	HE671693	72587	75258	am11-160	No indel				0
HmGr47	HE671693	72587	75258	am11-293	No indel				0
HmGr47	HE671693	72587	75258	am11-48	No indel				0
HmGr47	HE671693	72587	75258	ros2071	No indel				0
HmGr47	HE671693	72587	75258	ros531	No indel				0
HmGr47	HE671693	72587	75258	ros533	No indel				0
HmGr47	HE671693	72587	75258	ros546	No indel				0		1
HmGr48	HE671693	79713	84201	melPAN1	No indel
HmGr48	HE671693	79713	84201	ag09-108	No indel				0
HmGr48	HE671693	79713	84201	ag09-122	No indel				0
HmGr48	HE671693	79713	84201	ag11-569	No indel				0
HmGr48	HE671693	79713	84201	ag11-572	No indel				0
HmGr48	HE671693	79713	84201	am09-216	No indel				0
HmGr48	HE671693	79713	84201	am11-160	No indel				0
HmGr48	HE671693	79713	84201	am11-293	No indel				0
HmGr48	HE671693	79713	84201	am11-48	No indel				0
HmGr48	HE671693	79713	84201	ros2071	No indel				0
HmGr48	HE671693	79713	84201	ros531	No indel				0
HmGr48	HE671693	79713	84201	ros533	No indel				0
HmGr48	HE671693	79713	84201	ros546	No indel				0		1
HmGr49	HE671693	37075	43253	melPAN1	deletion	0.133637	37901	40100
HmGr49	HE671693	37075	43253	ag09-108	No indel				0
HmGr49	HE671693	37075	43253	ag09-122	deletion	0.0590323	38101	40000	1899
HmGr49	HE671693	37075	43253	ag11-569	deletion	0.064331	38101	40100	1999
HmGr49	HE671693	37075	43253	ag11-572	deletion	0.0322055	38101	40100	1999
HmGr49	HE671693	37075	43253	am09-216	deletion	0.06555	38101	40100	1999
HmGr49	HE671693	37075	43253	am11-160	deletion	0.0962171	38101	40100	1999
HmGr49	HE671693	37075	43253	am11-293	deletion	0.0315287	38101	40000	1899
HmGr49	HE671693	37075	43253	am11-48	deletion	0.101531	38101	40100	1999
HmGr49	HE671693	37075	43253	ros2071	No indel				0
HmGr49	HE671693	37075	43253	ros531	No indel				0
HmGr49	HE671693	37075	43253	ros533	No indel				0
HmGr49	HE671693	37075	43253	ros546	No indel				0			Excluding Gr49 because of reference genome
HmGr50	HE671693	66794	69228	melPAN1	No indel
HmGr50	HE671693	66794	69228	ag09-108	deletion	0.396253	68901	72300	3399
HmGr50	HE671693	66794	69228	ag09-122	No indel				0
HmGr50	HE671693	66794	69228	ag11-569	No indel				0
HmGr50	HE671693	66794	69228	ag11-572	deletion	0.353932	68601	72300	3699
HmGr50	HE671693	66794	69228	am09-216	No indel				0
HmGr50	HE671693	66794	69228	am11-160	No indel				0
HmGr50	HE671693	66794	69228	am11-293	No indel				0
HmGr50	HE671693	66794	69228	am11-48	deletion	0.274334	68901	72300	3399
HmGr50	HE671693	66794	69228	ros2071	No indel				0
HmGr50	HE671693	66794	69228	ros531	No indel				0
HmGr50	HE671693	66794	69228	ros533	deletion	0.353995	66701	69800	3099
HmGr50	HE671693	66794	69228	ros546	deletion	0.274884	67301	69500	2199	1
HmGr51	HE671693	85009	88375	melPAN1	No indel
HmGr51	HE671693	85009	88375	ag09-108	No indel				0
HmGr51	HE671693	85009	88375	ag09-122	No indel				0
HmGr51	HE671693	85009	88375	ag11-569	No indel				0
HmGr51	HE671693	85009	88375	ag11-572	No indel				0
HmGr51	HE671693	85009	88375	am09-216	No indel				0
HmGr51	HE671693	85009	88375	am11-160	deletion	0.0552549	87501	88000	499
HmGr51	HE671693	85009	88375	am11-293	deletion	0.0841886	87501	88000	499
HmGr51	HE671693	85009	88375	am11-48	deletion	0.100344	87501	88000	499
HmGr51	HE671693	85009	88375	ros2071	No indel				0
HmGr51	HE671693	85009	88375	ros531	No indel				0
HmGr51	HE671693	85009	88375	ros533	No indel				0
HmGr51	HE671693	85009	88375	ros546	No indel				0	1
HmGr53	HE671488	459456	460646	melPAN1	No indel
HmGr53	HE671488	459456	460646	ag09-108	duplication	2.52175	458701	461800	3099
HmGr53	HE671488	459456	460646	ag09-122	duplication	2.20453	458501	461800	3299
HmGr53	HE671488	459456	460646	ag11-569	No indel				0
HmGr53	HE671488	459456	460646	ag11-572	duplication	2.08915	454801	461800	6999
HmGr53	HE671488	459456	460646	am09-216	No indel				0
HmGr53	HE671488	459456	460646	am11-160	No indel				0
HmGr53	HE671488	459456	460646	am11-293	duplication	2.21886	454801	463100	8299
HmGr53	HE671488	459456	460646	am11-48	duplication	2.2992	458501	461800	3299
HmGr53	HE671488	459456	460646	ros2071	duplication	3.29932	458401	461700	3299
HmGr53	HE671488	459456	460646	ros531	No indel				0
HmGr53	HE671488	459456	460646	ros533	No indel				0
HmGr53	HE671488	459456	460646	ros546	No indel				0	1
HmGr54	HE671444	57873	59472	melPAN1	No indel
HmGr54	HE671444	57873	59472	ag09-108	No indel				0
HmGr54	HE671444	57873	59472	ag09-122	No indel				0
HmGr54	HE671444	57873	59472	ag11-569	No indel				0
HmGr54	HE671444	57873	59472	ag11-572	No indel				0
HmGr54	HE671444	57873	59472	am09-216	No indel				0
HmGr54	HE671444	57873	59472	am11-160	No indel				0
HmGr54	HE671444	57873	59472	am11-293	No indel				0
HmGr54	HE671444	57873	59472	am11-48	No indel				0
HmGr54	HE671444	57873	59472	ros2071	No indel				0
HmGr54	HE671444	57873	59472	ros531	No indel				0
HmGr54	HE671444	57873	59472	ros533	No indel				0
HmGr54	HE671444	57873	59472	ros546	No indel				0		1
HmGr55	HE670771	256911	260648	melPAN1	No indel
HmGr55	HE670771	256911	260648	ag09-108	No indel				0
HmGr55	HE670771	256911	260648	ag09-122	No indel				0
HmGr55	HE670771	256911	260648	ag11-569	deletion	0.281215	257501	263400	5899
HmGr55	HE670771	256911	260648	ag11-572	deletion	0.281489	254501	263400	8899
HmGr55	HE670771	256911	260648	am09-216	deletion	0.331799	256501	263300	6799
HmGr55	HE670771	256911	260648	am11-160	deletion	0.251295	257501	263400	5899
HmGr55	HE670771	256911	260648	am11-293	deletion	0.31161	250401	263400	12999
HmGr55	HE670771	256911	260648	am11-48	deletion	0.463619	250401	263400	12999
HmGr55	HE670771	256911	260648	ros2071	No indel				0
HmGr55	HE670771	256911	260648	ros531	No indel				0
HmGr55	HE670771	256911	260648	ros533	No indel				0
HmGr55	HE670771	256911	260648	ros546	No indel				0	1
HmGr56	HE670771	229024	232938	melPAN1	No indel
HmGr56	HE670771	229024	232938	ag09-108	duplication	3.27842	227901	233400	5499
HmGr56	HE670771	229024	232938	ag09-122	duplication	2.73713	227901	231900	3999
HmGr56	HE670771	229024	232938	ag09-122	duplication	2.96404	232201	233400	1199
HmGr56	HE670771	229024	232938	ag11-569	duplication	3.23791	227501	237100	9599
HmGr56	HE670771	229024	232938	ag11-572	No indel				0
HmGr56	HE670771	229024	232938	am09-216	No indel				0
HmGr56	HE670771	229024	232938	am11-160	duplication	2.44368	228501	233400	4899
HmGr56	HE670771	229024	232938	am11-293	duplication	2.07525	227801	233300	5499
HmGr56	HE670771	229024	232938	am11-48	duplication	2.39056	227901	231900	3999
HmGr56	HE670771	229024	232938	am11-48	duplication	2.68646	232201	233400	1199
HmGr56	HE670771	229024	232938	ros2071	No indel				0
HmGr56	HE670771	229024	232938	ros531	No indel				0
HmGr56	HE670771	229024	232938	ros533	No indel				0
HmGr56	HE670771	229024	232938	ros546	No indel				0	1
HmGr57	HE670235	20763	26042	melPAN1	No indel
HmGr57	HE670235	20763	26042	ag09-108	No indel				0
HmGr57	HE670235	20763	26042	ag09-122	No indel				0
HmGr57	HE670235	20763	26042	ag11-569	No indel				0
HmGr57	HE670235	20763	26042	ag11-572	No indel				0
HmGr57	HE670235	20763	26042	am09-216	No indel				0
HmGr57	HE670235	20763	26042	am11-160	No indel				0
HmGr57	HE670235	20763	26042	am11-293	No indel				0
HmGr57	HE670235	20763	26042	am11-48	No indel				0
HmGr57	HE670235	20763	26042	ros2071	No indel				0
HmGr57	HE670235	20763	26042	ros531	No indel				0
HmGr57	HE670235	20763	26042	ros533	No indel				0
HmGr57	HE670235	20763	26042	ros546	No indel				0		1
HmGr58	HE671681	98839	101567	melPAN1	No indel
HmGr58	HE671681	98839	101567	ag09-108	No indel				0
HmGr58	HE671681	98839	101567	ag09-122	No indel				0
HmGr58	HE671681	98839	101567	ag11-569	No indel				0
HmGr58	HE671681	98839	101567	ag11-572	No indel				0
HmGr58	HE671681	98839	101567	am09-216	No indel				0
HmGr58	HE671681	98839	101567	am11-160	No indel				0
HmGr58	HE671681	98839	101567	am11-293	No indel				0
HmGr58	HE671681	98839	101567	am11-48	No indel				0
HmGr58	HE671681	98839	101567	ros2071	No indel				0
HmGr58	HE671681	98839	101567	ros531	No indel				0
HmGr58	HE671681	98839	101567	ros533	No indel				0
HmGr58	HE671681	98839	101567	ros546	No indel				0		1
HmGr59	HE671681	106755	108751	melPAN1	No indel
HmGr59	HE671681	106755	108751	ag09-108	No indel				0
HmGr59	HE671681	106755	108751	ag09-122	No indel				0
HmGr59	HE671681	106755	108751	ag11-569	No indel				0
HmGr59	HE671681	106755	108751	ag11-572	No indel				0
HmGr59	HE671681	106755	108751	am09-216	No indel				0
HmGr59	HE671681	106755	108751	am11-160	No indel				0
HmGr59	HE671681	106755	108751	am11-293	No indel				0
HmGr59	HE671681	106755	108751	am11-48	No indel				0
HmGr59	HE671681	106755	108751	ros2071	No indel				0
HmGr59	HE671681	106755	108751	ros531	No indel				0
HmGr59	HE671681	106755	108751	ros533	No indel				0
HmGr59	HE671681	106755	108751	ros546	No indel				0		1
HmGr60	HE671945	128995	131456	melPAN1	No indel
HmGr60	HE671945	128995	131456	ag09-108	No indel				0
HmGr60	HE671945	128995	131456	ag09-122	No indel				0
HmGr60	HE671945	128995	131456	ag11-569	No indel				0
HmGr60	HE671945	128995	131456	ag11-572	No indel				0
HmGr60	HE671945	128995	131456	am09-216	No indel				0
HmGr60	HE671945	128995	131456	am11-160	No indel				0
HmGr60	HE671945	128995	131456	am11-293	No indel				0
HmGr60	HE671945	128995	131456	am11-48	No indel				0
HmGr60	HE671945	128995	131456	ros2071	No indel				0
HmGr60	HE671945	128995	131456	ros531	No indel				0
HmGr60	HE671945	128995	131456	ros533	No indel				0
HmGr60	HE671945	128995	131456	ros546	No indel				0		1
HmGr61	HE671681	103397	105798	melPAN1	No indel
HmGr61	HE671681	103397	105798	ag09-108	deletion	0.129044	102701	106600	3899
HmGr61	HE671681	103397	105798	ag09-122	deletion	0.101708	103001	106600	3599
HmGr61	HE671681	103397	105798	ag11-569	deletion	0.100982	103001	106600	3599
HmGr61	HE671681	103397	105798	ag11-572	deletion	0.0930311	103001	106600	3599
HmGr61	HE671681	103397	105798	am09-216	deletion	0.29163	101701	106600	4899
HmGr61	HE671681	103397	105798	am11-160	deletion	0.0974802	102901	106600	3699
HmGr61	HE671681	103397	105798	am11-293	deletion	0.110786	102701	106600	3899
HmGr61	HE671681	103397	105798	am11-48	deletion	0.0923698	102701	106600	3899
HmGr61	HE671681	103397	105798	ros2071	No indel				0
HmGr61	HE671681	103397	105798	ros531	No indel				0
HmGr61	HE671681	103397	105798	ros533	No indel				0
HmGr61	HE671681	103397	105798	ros546	No indel				0	1
HmGr62	HE671162	711477	713557	melPAN1	No indel
HmGr62	HE671162	711477	713557	ag09-108	No indel				0
HmGr62	HE671162	711477	713557	ag09-122	No indel				0
HmGr62	HE671162	711477	713557	ag11-569	No indel				0
HmGr62	HE671162	711477	713557	ag11-572	No indel				0
HmGr62	HE671162	711477	713557	am09-216	No indel				0
HmGr62	HE671162	711477	713557	am11-160	No indel				0
HmGr62	HE671162	711477	713557	am11-293	No indel				0
HmGr62	HE671162	711477	713557	am11-48	No indel				0
HmGr62	HE671162	711477	713557	ros2071	No indel				0
HmGr62	HE671162	711477	713557	ros531	No indel				0
HmGr62	HE671162	711477	713557	ros533	No indel				0
HmGr62	HE671162	711477	713557	ros546	No indel				0		1
HmGr64	HE671681	116094	119328	melPAN1	No indel
HmGr64	HE671681	116094	119328	ag09-108	deletion	0.395021	109201	119000	9799
HmGr64	HE671681	116094	119328	ag09-122	deletion	0.18297	114101	117300	3199
HmGr64	HE671681	116094	119328	ag11-569	No indel				0
HmGr64	HE671681	116094	119328	ag11-572	deletion	0.436722	109801	119000	9199
HmGr64	HE671681	116094	119328	am09-216	No indel				0
HmGr64	HE671681	116094	119328	am11-160	deletion	0.349482	111701	116700	4999
HmGr64	HE671681	116094	119328	am11-160	deletion	0.259599	117601	119000	1399
HmGr64	HE671681	116094	119328	am11-293	deletion	0.359362	111901	118300	6399
HmGr64	HE671681	116094	119328	am11-48	deletion	0.498174	114201	118200	3999
HmGr64	HE671681	116094	119328	ros2071	No indel				0
HmGr64	HE671681	116094	119328	ros531	No indel				0
HmGr64	HE671681	116094	119328	ros533	No indel				0
HmGr64	HE671681	116094	119328	ros546	No indel				0	1
HmGr65	HE671681	109874	113934	melPAN1	No indel
HmGr65	HE671681	109874	113934	ag09-108	deletion	0.395021	109201	119000	9799
HmGr65	HE671681	109874	113934	ag09-122	No indel				0
HmGr65	HE671681	109874	113934	ag11-569	No indel				0
HmGr65	HE671681	109874	113934	ag11-572	deletion	0.436722	109801	119000	9199
HmGr65	HE671681	109874	113934	am09-216	No indel				0
HmGr65	HE671681	109874	113934	am11-160	deletion	0.367873	109101	111400	2299
HmGr65	HE671681	109874	113934	am11-160	deletion	0.349482	111701	116700	4999
HmGr65	HE671681	109874	113934	am11-293	deletion	0.359362	111901	118300	6399
HmGr65	HE671681	109874	113934	am11-48	deletion	0.48977	109901	113100	3199
HmGr65	HE671681	109874	113934	ros2071	No indel				0
HmGr65	HE671681	109874	113934	ros531	No indel				0
HmGr65	HE671681	109874	113934	ros533	No indel				0
HmGr65	HE671681	109874	113934	ros546	No indel				0	1
HmGr67	HE671321	130151	132305	melPAN1	No indel
HmGr67	HE671321	130151	132305	ag09-108	No indel				0
HmGr67	HE671321	130151	132305	ag09-122	No indel				0
HmGr67	HE671321	130151	132305	ag11-569	No indel				0
HmGr67	HE671321	130151	132305	ag11-572	No indel				0
HmGr67	HE671321	130151	132305	am09-216	No indel				0
HmGr67	HE671321	130151	132305	am11-160	No indel				0
HmGr67	HE671321	130151	132305	am11-293	No indel				0
HmGr67	HE671321	130151	132305	am11-48	No indel				0
HmGr67	HE671321	130151	132305	ros2071	No indel				0
HmGr67	HE671321	130151	132305	ros531	No indel				0
HmGr67	HE671321	130151	132305	ros533	No indel				0
HmGr67	HE671321	130151	132305	ros546	No indel				0		1
HmGr69	HE668809	264451	267085	melPAN1	No indel
HmGr69	HE668809	264451	267085	ag09-108	No indel				0
HmGr69	HE668809	264451	267085	ag09-122	No indel				0
HmGr69	HE668809	264451	267085	ag11-569	No indel				0
HmGr69	HE668809	264451	267085	ag11-572	No indel				0
HmGr69	HE668809	264451	267085	am09-216	No indel				0
HmGr69	HE668809	264451	267085	am11-160	No indel				0
HmGr69	HE668809	264451	267085	am11-293	No indel				0
HmGr69	HE668809	264451	267085	am11-48	No indel				0
HmGr69	HE668809	264451	267085	ros2071	No indel				0
HmGr69	HE668809	264451	267085	ros531	No indel				0
HmGr69	HE668809	264451	267085	ros533	No indel				0
HmGr69	HE668809	264451	267085	ros546	No indel				0		1
HmGr70	HE670815	347003	348894	melPAN1	No indel
HmGr70	HE670815	347003	348894	ag09-108	No indel				0
HmGr70	HE670815	347003	348894	ag09-122	No indel				0
HmGr70	HE670815	347003	348894	ag11-569	deletion	0.333385	347001	348200	1199
HmGr70	HE670815	347003	348894	ag11-572	No indel				0
HmGr70	HE670815	347003	348894	am09-216	No indel				0
HmGr70	HE670815	347003	348894	am11-160	No indel				0
HmGr70	HE670815	347003	348894	am11-293	No indel				0
HmGr70	HE670815	347003	348894	am11-48	No indel				0
HmGr70	HE670815	347003	348894	ros2071	No indel				0
HmGr70	HE670815	347003	348894	ros531	No indel				0
HmGr70	HE670815	347003	348894	ros533	No indel				0
HmGr70	HE670815	347003	348894	ros546	No indel				0	1
HmGr71	HE670815	349693	351621	melPAN1	No indel
HmGr71	HE670815	349693	351621	ag09-108	No indel				0
HmGr71	HE670815	349693	351621	ag09-122	No indel				0
HmGr71	HE670815	349693	351621	ag11-569	No indel				0
HmGr71	HE670815	349693	351621	ag11-572	No indel				0
HmGr71	HE670815	349693	351621	am09-216	No indel				0
HmGr71	HE670815	349693	351621	am11-160	No indel				0
HmGr71	HE670815	349693	351621	am11-293	No indel				0
HmGr71	HE670815	349693	351621	am11-48	No indel				0
HmGr71	HE670815	349693	351621	ros2071	No indel				0
HmGr71	HE670815	349693	351621	ros531	No indel				0
HmGr71	HE670815	349693	351621	ros533	No indel				0
HmGr71	HE670815	349693	351621	ros546	No indel				0		1
HmGr72	HE671160	62767	65269	melPAN1	No indel
HmGr72	HE671160	62767	65269	ag09-108	No indel				0
HmGr72	HE671160	62767	65269	ag09-122	No indel				0
HmGr72	HE671160	62767	65269	ag11-569	No indel				0
HmGr72	HE671160	62767	65269	ag11-572	duplication				0
HmGr72	HE671160	62767	65269	am09-216	duplication	2.1816	62501	66700	4199
HmGr72	HE671160	62767	65269	am11-160	No indel				0
HmGr72	HE671160	62767	65269	am11-293	duplication	2.82856	62501	66700	4199
HmGr72	HE671160	62767	65269	am11-48	No indel				0
HmGr72	HE671160	62767	65269	ros2071	duplication	2.01086	54501	64600	10099
HmGr72	HE671160	62767	65269	ros2071	deletion	0.359124	64601	71200	6599
HmGr72	HE671160	62767	65269	ros531	No indel				0
HmGr72	HE671160	62767	65269	ros533	No indel				0
HmGr72	HE671160	62767	65269	ros533	deletion	0.419974	64501	71100	6599
HmGr72	HE671160	62767	65269	ros546	duplication				0	1
HmGr73	HE671160	58988	61320	cyd565	No indel
HmGr73	HE671160	58988	61320	ag09-108	No indel				0
HmGr73	HE671160	58988	61320	ag09-122	deletion	0.101905	61201	62500	1299
HmGr73	HE671160	58988	61320	ag11-569	deletion	0.126901	61201	62500	1299
HmGr73	HE671160	58988	61320	ag11-572	No indel				0
HmGr73	HE671160	58988	61320	am09-216	duplication	2.10816	56901	61200	4299
HmGr73	HE671160	58988	61320	am11-160	No indel				0
HmGr73	HE671160	58988	61320	am11-160	deletion	0.129165	61201	62500	1299
HmGr73	HE671160	58988	61320	am11-293	duplication	2.59285	56901	61400	4499
HmGr73	HE671160	58988	61320	am11-48	No indel				0
HmGr73	HE671160	58988	61320	am11-48	deletion	0.12916	61301	62500	1199
HmGr73	HE671160	58988	61320	ros2071	duplication	2.01086	54501	64600	10099
HmGr73	HE671160	58988	61320	ros531	No indel				0
HmGr73	HE671160	58988	61320	ros533	No indel				0
HmGr73	HE671160	58988	61320	ros546	No indel				0	1
										28	23

## Sheet: non-conserved_Gr_Hcyd
GR gene	Scaffold	GR start	Gr end	Individual	Indel type	Indel depth	Indel start	Indel end	Size	CNV	noCNV
HmGr10	HE670771	218820	223034	cyd553	No indel				0
HmGr10	HE670771	218820	223034	cyd560	No indel				0
HmGr10	HE670771	218820	223034	cyd564	No indel				0
HmGr10	HE670771	218820	223034	cyd565	No indel				0		1
HmGr11	HE671947	10383	12383	cyd553	duplication	3.65571	12201	16100	3899
HmGr11	HE671947	10383	12383	cyd560	No indel				0
HmGr11	HE671947	10383	12383	cyd564	duplication	7.39984	12201	16100	3899
HmGr11	HE671947	10383	12383	cyd565	No indel				0	1
HmGr12	HE671947	4015	6290	cyd553	No indel				0
HmGr12	HE671947	4015	6290	cyd560	No indel				0
HmGr12	HE671947	4015	6290	cyd564	No indel				0
HmGr12	HE671947	4015	6290	cyd565	No indel				0		1
HmGr13	HE672041	37002	40191	cyd553	No indel				0
HmGr13	HE672041	37002	40191	cyd560	No indel				0
HmGr13	HE672041	37002	40191	cyd564	No indel				0
HmGr13	HE672041	37002	40191	cyd565	No indel				0		1
HmGr14	HE671444	4830	8276	cyd553	No indel				0
HmGr14	HE671444	4830	8276	cyd560	No indel				0
HmGr14	HE671444	4830	8276	cyd564	No indel				0
HmGr14	HE671444	4830	8276	cyd565	No indel				0		1
HmGr15	HE670201	22477	24325	cyd553	No indel				0
HmGr15	HE670201	22477	24325	cyd560	No indel				0
HmGr15	HE670201	22477	24325	cyd564	No indel				0
HmGr15	HE670201	22477	24325	cyd565	No indel				0		1
HmGr16	HE670771	238429	243240	cyd553	duplication	2.82686	226701	256000	29299
HmGr16	HE670771	238429	243240	cyd560	No indel				0
HmGr16	HE670771	238429	243240	cyd564	duplication	2.1913	227701	243600	15899
HmGr16	HE670771	238429	243240	cyd565	duplication	2.83098	227501	256300	28799	1
HmGr17	HE671576	89612	91935	cyd553	duplication	2.84797	87901	92300	4399
HmGr17	HE671576	89612	91935	cyd560	No indel				0
HmGr17	HE671576	89612	91935	cyd564	duplication	2.20118	81301	90000	8699
HmGr17	HE671576	89612	91935	cyd565	No indel				0	1
HmGr18	HE671576	78385	82256	cyd553	No indel				0
HmGr18	HE671576	78385	82256	cyd560	No indel				0
HmGr18	HE671576	78385	82256	cyd564	duplication	2.20118	81301	90000	8699
HmGr18	HE671576	78385	82256	cyd565	duplication	2.76512	81301	87800	6499	1
HmGr22	HE671488	472124	473341	cyd553	No indel				0
HmGr22	HE671488	472124	473341	cyd560	No indel				0
HmGr22	HE671488	472124	473341	cyd564	No indel				0
HmGr22	HE671488	472124	473341	cyd565	No indel				0		1
HmGr23	HE670235	29007	30170	cyd553	No indel				0
HmGr23	HE670235	29007	30170	cyd560	No indel				0
HmGr23	HE670235	29007	30170	cyd564	No indel				0
HmGr23	HE670235	29007	30170	cyd565	No indel				0		1
HmGr24	HE671488	464274	465482	cyd553	No indel				0
HmGr24	HE671488	464274	465482	cyd560	No indel				0
HmGr24	HE671488	464274	465482	cyd564	No indel				0
HmGr24	HE671488	464274	465482	cyd565	No indel				0		1
HmGr25	HE671488	461588	462808	cyd553	No indel				0
HmGr25	HE671488	461588	462808	cyd560	No indel				0
HmGr25	HE671488	461588	462808	cyd564	No indel				0
HmGr25	HE671488	461588	462808	cyd565	No indel				0		1
HmGr26	HE671326	2786	4998	cyd553	No indel				0
HmGr26	HE671326	2786	4998	cyd560	No indel				0
HmGr26	HE671326	2786	4998	cyd564	No indel				0
HmGr26	HE671326	2786	4998	cyd565	No indel				0		1
HmGr27	HE670885	26433	28408	cyd553	No indel				0
HmGr27	HE670885	26433	28408	cyd560	No indel				0
HmGr27	HE670885	26433	28408	cyd564	No indel				0
HmGr27	HE670885	26433	28408	cyd565	No indel				0		1
HmGr28	HE669805	1372	2687	cyd553	No indel				0
HmGr28	HE669805	1372	2687	cyd560	No indel				0
HmGr28	HE669805	1372	2687	cyd564	No indel				0
HmGr28	HE669805	1372	2687	cyd565	No indel				0		1
HmGr29	HE670607	251665	254347	cyd553	No indel				0
HmGr29	HE670607	251665	254347	cyd560	No indel				0
HmGr29	HE670607	251665	254347	cyd564	No indel				0
HmGr29	HE670607	251665	254347	cyd565	No indel				0		1
HmGr30	HE670607	245241	247379	cyd553	No indel				0
HmGr30	HE670607	245241	247379	cyd560	No indel				0
HmGr30	HE670607	245241	247379	cyd564	No indel				0
HmGr30	HE670607	245241	247379	cyd565	No indel				0		1
HmGr31	HE671844	4556	6597	cyd553	No indel				0
HmGr31	HE671844	4556	6597	cyd560	No indel				0
HmGr31	HE671844	4556	6597	cyd564	No indel				0
HmGr31	HE671844	4556	6597	cyd565	No indel				0		1
HmGr32	HE671160	44889	46587	cyd553	No indel				0
HmGr32	HE671160	44889	46587	cyd560	No indel				0
HmGr32	HE671160	44889	46587	cyd564	No indel				0
HmGr32	HE671160	44889	46587	cyd565	No indel				0		1
HmGr33	HE671160	41716	44178	cyd553	No indel				0
HmGr33	HE671160	41716	44178	cyd560	No indel				0
HmGr33	HE671160	41716	44178	cyd564	No indel				0
HmGr33	HE671160	41716	44178	cyd565	No indel				0		1
HmGr34	HE671947	53501	55638	cyd553	No indel				0
HmGr34	HE671947	53501	55638	cyd560	No indel				0
HmGr34	HE671947	53501	55638	cyd564	No indel				0
HmGr34	HE671947	53501	55638	cyd565	No indel				0		1
HmGr35	HE671947	20809	22523	cyd553	No indel				0
HmGr35	HE671947	20809	22523	cyd560	No indel				0
HmGr35	HE671947	20809	22523	cyd564	No indel				0
HmGr35	HE671947	20809	22523	cyd565	No indel				0		1
HmGr36	HE671326	2786	4998	cyd553	No indel				0
HmGr36	HE671326	2786	4998	cyd560	No indel				0
HmGr36	HE671326	2786	4998	cyd564	No indel				0
HmGr36	HE671326	2786	4998	cyd565	No indel				0		1
HmGr37	HE671284	14458	17567	cyd553	No indel				0
HmGr37	HE671284	14458	17567	cyd560	No indel				0
HmGr37	HE671284	14458	17567	cyd564	duplication	2.28735	13201	20400	7199
HmGr37	HE671284	14458	17567	cyd565	No indel				0			Excluding HmGr37 because of reference genome mapping
HmGr38	HE671947	34245	37090	cyd553	No indel				0
HmGr38	HE671947	34245	37090	cyd560	No indel				0
HmGr38	HE671947	34245	37090	cyd564	No indel				0
HmGr38	HE671947	34245	37090	cyd565	No indel				0		1
HmGr39	HE671947	14877	19576	cyd553	duplication	3.65571	12201	16100	3899			Excluding HmGr39 because of reference genome mapping
HmGr39	HE671947	14877	19576	cyd553	deletion	0.124169	16101	18600	2499
HmGr39	HE671947	14877	19576	cyd560	deletion	0.210467	16001	18600	2599
HmGr39	HE671947	14877	19576	cyd564	duplication	7.39984	12201	16100	3899
HmGr39	HE671947	14877	19576	cyd564	deletion	0.159225	16101	18600	2499
HmGr39	HE671947	14877	19576	cyd565	No indel				0
HmGr40	HE671947	48710	51325	cyd553	No indel				0
HmGr40	HE671947	48710	51325	cyd560	No indel				0
HmGr40	HE671947	48710	51325	cyd564	duplication	2.3199	48501	52000	3499
HmGr40	HE671947	48710	51325	cyd565	No indel				0	1
HmGr41	HE671284	2788	7958	cyd553	deletion	0.228414	6501	8400	1899
HmGr41	HE671284	2788	7958	cyd560	deletion	0.4565	6501	13200	6699
HmGr41	HE671284	2788	7958	cyd564	No indel				0
HmGr41	HE671284	2788	7958	cyd565	No indel				0	1
HmGr42	HE672024	304703	307376	cyd553	No indel				0
HmGr42	HE672024	304703	307376	cyd560	No indel				0
HmGr42	HE672024	304703	307376	cyd564	No indel				0
HmGr42	HE672024	304703	307376	cyd565	No indel				0		1
HmGr43	HE671073	26556	29079	cyd553	No indel				0
HmGr43	HE671073	26556	29079	cyd560	No indel				0
HmGr43	HE671073	26556	29079	cyd564	No indel				0
HmGr43	HE671073	26556	29079	cyd565	No indel				0		1
HmGr47	HE671693	72587	75258	cyd553	No indel				0
HmGr47	HE671693	72587	75258	cyd560	No indel				0
HmGr47	HE671693	72587	75258	cyd564	No indel				0
HmGr47	HE671693	72587	75258	cyd565	No indel				0		1
HmGr48	HE671693	79713	84201	cyd553	No indel				0
HmGr48	HE671693	79713	84201	cyd560	No indel				0
HmGr48	HE671693	79713	84201	cyd564	No indel				0
HmGr48	HE671693	79713	84201	cyd565	No indel				0		1
HmGr49	HE671693	37075	43253	cyd553	deletion	0.123056	32901	45700	12799
HmGr49	HE671693	37075	43253	cyd560	deletion	0.197534	37701	42800	5099
HmGr49	HE671693	37075	43253	cyd564	deletion	0.110441	33001	44800	11799
HmGr49	HE671693	37075	43253	cyd565	deletion	0.300062	32801	44800	11999			Excluding Gr49 because of reference genome mapping
HmGr50	HE671693	66794	69228	cyd553	No indel				0
HmGr50	HE671693	66794	69228	cyd560	No indel				0
HmGr50	HE671693	66794	69228	cyd564	No indel				0
HmGr50	HE671693	66794	69228	cyd565	No indel				0		1
HmGr51	HE671693	85009	88375	cyd553	No indel				0
HmGr51	HE671693	85009	88375	cyd560	No indel				0
HmGr51	HE671693	85009	88375	cyd564	No indel				0
HmGr51	HE671693	85009	88375	cyd565	No indel				0		1
HmGr53	HE671488	459456	460646	cyd553	No indel				0
HmGr53	HE671488	459456	460646	cyd560	No indel				0
HmGr53	HE671488	459456	460646	cyd564	No indel				0
HmGr53	HE671488	459456	460646	cyd565	No indel				0		1
HmGr54	HE671444	57873	59472	cyd553	No indel				0
HmGr54	HE671444	57873	59472	cyd560	No indel				0
HmGr54	HE671444	57873	59472	cyd564	No indel				0
HmGr54	HE671444	57873	59472	cyd565	No indel				0		1
HmGr55	HE670771	256911	260648	cyd553	No indel				0
HmGr55	HE670771	256911	260648	cyd560	No indel				0
HmGr55	HE670771	256911	260648	cyd564	duplication	6.19376	258101	260100	1999
HmGr55	HE670771	256911	260648	cyd565	No indel				0	1
HmGr56	HE670771	229024	232938	cyd553	duplication	2.82686	226701	256000	29299
HmGr56	HE670771	229024	232938	cyd560	No indel				0
HmGr56	HE670771	229024	232938	cyd564	duplication	2.1913	227701	243600	15899
HmGr56	HE670771	229024	232938	cyd565	duplication	2.83098	227501	256300	28799	1
HmGr57	HE670235	20763	26042	cyd553	No indel				0
HmGr57	HE670235	20763	26042	cyd560	No indel				0
HmGr57	HE670235	20763	26042	cyd564	No indel				0
HmGr57	HE670235	20763	26042	cyd565	No indel				0		1
HmGr58	HE671681	98839	101567	cyd553	No indel				0
HmGr58	HE671681	98839	101567	cyd560	No indel				0
HmGr58	HE671681	98839	101567	cyd564	duplication	2.13563	98801	103500	4699
HmGr58	HE671681	98839	101567	cyd565	duplication	2.09559	98801	101700	2899	1
HmGr59	HE671681	106755	108751	cyd553	No indel				0
HmGr59	HE671681	106755	108751	cyd560	No indel				0
HmGr59	HE671681	106755	108751	cyd564	No indel				0
HmGr59	HE671681	106755	108751	cyd565	No indel				0		1
HmGr60	HE671945	128995	131456	cyd553	No indel				0
HmGr60	HE671945	128995	131456	cyd560	No indel				0
HmGr60	HE671945	128995	131456	cyd564	No indel				0
HmGr60	HE671945	128995	131456	cyd565	No indel				0		1
HmGr61	HE671681	103397	105798	cyd553	No indel				0
HmGr61	HE671681	103397	105798	cyd560	No indel				0
HmGr61	HE671681	103397	105798	cyd564	duplication	2.13563	98801	103500	4699
HmGr61	HE671681	103397	105798	cyd565	No indel				0	1
HmGr62	HE671162	711477	713557	cyd553	No indel				0
HmGr62	HE671162	711477	713557	cyd560	No indel				0
HmGr62	HE671162	711477	713557	cyd564	No indel				0
HmGr62	HE671162	711477	713557	cyd565	No indel				0		1
HmGr64	HE671681	116094	119328	cyd553	No indel				0
HmGr64	HE671681	116094	119328	cyd560	No indel				0
HmGr64	HE671681	116094	119328	cyd564	No indel				0
HmGr64	HE671681	116094	119328	cyd565	No indel				0		1
HmGr65	HE671681	109874	113934	cyd553	No indel				0
HmGr65	HE671681	109874	113934	cyd560	No indel				0
HmGr65	HE671681	109874	113934	cyd564	No indel				0
HmGr65	HE671681	109874	113934	cyd565	No indel				0		1
HmGr67	HE671321	130151	132305	cyd553	No indel				0
HmGr67	HE671321	130151	132305	cyd560	No indel				0
HmGr67	HE671321	130151	132305	cyd564	No indel				0
HmGr67	HE671321	130151	132305	cyd565	No indel				0		1
HmGr69	HE668809	264451	267085	cyd553	No indel				0
HmGr69	HE668809	264451	267085	cyd560	No indel				0
HmGr69	HE668809	264451	267085	cyd564	No indel				0
HmGr69	HE668809	264451	267085	cyd565	No indel				0		1
HmGr70	HE670815	347003	348894	cyd553	No indel				0
HmGr70	HE670815	347003	348894	cyd560	No indel				0
HmGr70	HE670815	347003	348894	cyd564	No indel				0
HmGr70	HE670815	347003	348894	cyd565	No indel				0		1
HmGr71	HE670815	349693	351621	cyd553	No indel				0
HmGr71	HE670815	349693	351621	cyd560	No indel				0
HmGr71	HE670815	349693	351621	cyd564	No indel				0
HmGr71	HE670815	349693	351621	cyd565	No indel				0		1
HmGr72	HE671160	62767	65269	cyd553	No indel				0
HmGr72	HE671160	62767	65269	cyd560	No indel				0
HmGr72	HE671160	62767	65269	cyd564	No indel				0
HmGr72	HE671160	62767	65269	cyd565	No indel				0		1
HmGr73	HE671160	58988	61320	cyd553	No indel				0
HmGr73	HE671160	58988	61320	cyd560	No indel				0
HmGr73	HE671160	58988	61320	cyd564	No indel				0
HmGr73	HE671160	58988	61320	cyd565	No indel				0		1
										10	41

## Sheet: sugar_receptors_Hmel
GR gene	Scaffold	GR start	Gr end	Individual	Indel type	Indel depth	Indel start	Indel end	Size	CNV	noCNV
HmGr4	HE667900	101745	108848	melPAN1	No indel
HmGr4	HE667900	101745	108848	ag09-108	duplication	4.2254	88901	105000	16099
HmGr4	HE667900	101745	108848	ag09-108	duplication	4.31806	107901	109800	1899
HmGr4	HE667900	101745	108848	ag09-122	duplication	2.70084	98601	105000	6399
HmGr4	HE667900	101745	108848	ag09-122	duplication	3.39386	107901	109600	1699
HmGr4	HE667900	101745	108848	ag11-569	duplication	3.28629	73001	139100	66099
HmGr4	HE667900	101745	108848	ag11-572	duplication	2.79572	91001	139100	48099
HmGr4	HE667900	101745	108848	am09-216	duplication	5.41497	93601	109800	16199
HmGr4	HE667900	101745	108848	am11-160	duplication	4.49421	73201	106300	33099
HmGr4	HE667900	101745	108848	am11-160	duplication	2.32428	107901	121200	13299
HmGr4	HE667900	101745	108848	am11-293	duplication	5.04863	73001	122500	49499
HmGr4	HE667900	101745	108848	am11-48	duplication	3.44308	91001	122500	31499
HmGr4	HE667900	101745	108848	ros2071	No indel				0
HmGr4	HE667900	101745	108848	ros531	No indel				0
HmGr4	HE667900	101745	108848	ros533	No indel				0
HmGr4	HE667900	101745	108848	ros546	No indel				0	1
HmGr5	HE667900	78249	82242	ag09-108	duplication	4.97393	73101	87800	14699
HmGr5	HE667900	78249	82242	ag09-122	duplication	2.17244	73001	87800	14799
HmGr5	HE667900	78249	82242	ag11-569	duplication	3.28629	73001	139100	66099
HmGr5	HE667900	78249	82242	ag11-572	duplication	4.99817	73001	87500	14499
HmGr5	HE667900	78249	82242	am09-216	duplication	7.55833	73101	93200	20099
HmGr5	HE667900	78249	82242	am11-160	duplication	4.49421	73201	106300	33099
HmGr5	HE667900	78249	82242	am11-293	duplication	5.04863	73001	122500	49499
HmGr5	HE667900	78249	82242	am11-48	duplication	4.42934	73101	90400	17299
HmGr5	HE667900	78249	82242	ros2071	No indel				0
HmGr5	HE667900	78249	82242	ros531	No indel				0
HmGr5	HE667900	78249	82242	ros533	No indel				0
HmGr5	HE667900	78249	82242	ros546	No indel				0	1
HmGr6	HE671377	38871	47179	melPAN1	No indel
HmGr6	HE671377	38871	47179	ag09-108	duplication	5.43284	38201	51500	13299
HmGr6	HE671377	38871	47179	ag09-122	duplication	2.22683	38201	59700	21499
HmGr6	HE671377	38871	47179	ag11-569	duplication	5.1387	38201	52600	14399
HmGr6	HE671377	38871	47179	ag11-572	duplication	4.14369	32501	51200	18699
HmGr6	HE671377	38871	47179	am09-216	duplication	6.31216	38201	51300	13099
HmGr6	HE671377	38871	47179	am11-160	duplication	4.30865	38201	49200	10999
HmGr6	HE671377	38871	47179	am11-293	duplication	5.46186	38201	49200	10999
HmGr6	HE671377	38871	47179	am11-48	duplication	3.39081	38201	50500	12299
HmGr6	HE671377	38871	47179	ros2071	No indel				0
HmGr6	HE671377	38871	47179	ros531	No indel				0
HmGr6	HE671377	38871	47179	ros533	No indel				0
HmGr6	HE671377	38871	47179	ros546	No indel				0	1
HmGr7	HE667900	65725	71696	melPAN1	No indel
HmGr7	HE667900	65725	71696	ag09-108	duplication	5.81523	69201	71800	2599
HmGr7	HE667900	65725	71696	ag09-122	duplication	2.12723	69101	72000	2899
HmGr7	HE667900	65725	71696	ag11-569	duplication	6.56725	63101	71900	8799
HmGr7	HE667900	65725	71696	ag11-572	No indel				0
HmGr7	HE667900	65725	71696	am09-216	duplication	7.46905	69101	71900	2799
HmGr7	HE667900	65725	71696	am11-160	duplication	4.85724	69101	71800	2699
HmGr7	HE667900	65725	71696	am11-293	duplication	7.85472	63101	71900	8799
HmGr7	HE667900	65725	71696	am11-48	duplication	3.98339	69101	71800	2699
HmGr7	HE667900	65725	71696	ros2071	No indel				0
HmGr7	HE667900	65725	71696	ros531	No indel				0
HmGr7	HE667900	65725	71696	ros533	No indel				0
HmGr7	HE667900	65725	71696	ros546	No indel				0	1
HmGr8	HE671377	17231	21976	melPAN1	No indel
HmGr8	HE671377	17231	21976	ag09-122	duplication	3.50716	11201	22100	10899
HmGr8	HE671377	17231	21976	ag11-569	duplication	4.39558	11201	22100	10899
HmGr8	HE671377	17231	21976	ag11-572	duplication	4.49012	12401	22100	9699
HmGr8	HE671377	17231	21976	am09-216	duplication	5.32639	11201	22100	10899
HmGr8	HE671377	17231	21976	am11-160	duplication	3.92778	11201	22100	10899
HmGr8	HE671377	17231	21976	am11-293	duplication	5.61314	11201	22100	10899
HmGr8	HE671377	17231	21976	am11-48	duplication	3.5842	12401	22100	9699
HmGr8	HE671377	17231	21976	ros2071	No indel				0
HmGr8	HE671377	17231	21976	ros531	No indel				0
HmGr8	HE671377	17231	21976	ros533	No indel				0
HmGr8	HE671377	17231	21976	ros546	No indel				0	1
HmGr9	HE670235	81799	92404	melPAN1	No indel
HmGr9	HE670235	81799	92404	ag09-122	No indel				0
HmGr9	HE670235	81799	92404	ag11-569	No indel				0
HmGr9	HE670235	81799	92404	ag11-572	No indel				0
HmGr9	HE670235	81799	92404	am09-216	No indel				0
HmGr9	HE670235	81799	92404	am11-160	No indel				0
HmGr9	HE670235	81799	92404	am11-293	No indel				0
HmGr9	HE670235	81799	92404	am11-48	No indel				0
HmGr9	HE670235	81799	92404	ros2071	No indel				0
HmGr9	HE670235	81799	92404	ros531	No indel				0
HmGr9	HE670235	81799	92404	ros531	deletion	0.132795	88401	89500	1099
HmGr9	HE670235	81799	92404	ros533	No indel				0
HmGr9	HE670235	81799	92404	ros546	No indel				0	1
HmGr45	HE671377	28429	33571	melPAN1	No indel
HmGr45	HE671377	28429	33571	ag09-108	duplication	5.52457	28301	31400	3099
HmGr45	HE671377	28429	33571	ag09-108	duplication	4.99927	32501	34900	2399
HmGr45	HE671377	28429	33571	ag09-122	duplication	3.09615	23801	31500	7699
HmGr45	HE671377	28429	33571	ag09-122	duplication	2.71115	32601	34900	2299
HmGr45	HE671377	28429	33571	ag11-569	duplication	5.68369	23801	31400	7599
HmGr45	HE671377	28429	33571	ag11-569	duplication	5.0415	32601	34900	2299
HmGr45	HE671377	28429	33571	ag11-572	duplication	4.04202	28301	31500	3199
HmGr45	HE671377	28429	33571	ag11-572	duplication	4.14369	32501	51200	18699
HmGr45	HE671377	28429	33571	am09-216	duplication	5.81742	26701	34900	8199
HmGr45	HE671377	28429	33571	am11-160	duplication	4.45849	28201	31400	3199
HmGr45	HE671377	28429	33571	am11-160	duplication	4.81236	32601	34900	2299
HmGr45	HE671377	28429	33571	am11-293	duplication	6.34236	23801	31400	7599
HmGr45	HE671377	28429	33571	am11-293	duplication	6.08567	32601	34900	2299
HmGr45	HE671377	28429	33571	am11-48	duplication	3.4601	26701	31500	4799
HmGr45	HE671377	28429	33571	am11-48	deletion	0.0941364	31501	31900	399
HmGr45	HE671377	28429	33571	am11-48	duplication	2.93189	31901	34900	2999
HmGr45	HE671377	28429	33571	ros2071	No indel				0
HmGr45	HE671377	28429	33571	ros531	No indel				0
HmGr45	HE671377	28429	33571	ros533	No indel				0
HmGr45	HE671377	28429	33571	ros546	No indel				0	1
HmGr52	HE667900	82814	87129	melPAN1	No indel
HmGr52	HE667900	82814	87129	ag09-108	duplication	4.97393	73101	87800	14699
HmGr52	HE667900	82814	87129	ag09-122	duplication	2.17244	73001	87800	14799
HmGr52	HE667900	82814	87129	ag11-569	duplication	3.28629	73001	139100	66099
HmGr52	HE667900	82814	87129	ag11-572	duplication	4.99817	73001	87500	14499
HmGr52	HE667900	82814	87129	am09-216	duplication	7.55833	73101	93200	20099
HmGr52	HE667900	82814	87129	am11-160	duplication	4.49421	73201	106300	33099
HmGr52	HE667900	82814	87129	am11-293	duplication	5.04863	73001	122500	49499
HmGr52	HE667900	82814	87129	am11-48	duplication	4.42934	73101	90400	17299
HmGr52	HE667900	82814	87129	ros2071	No indel				0
HmGr52	HE667900	82814	87129	ros531	No indel				0
HmGr52	HE667900	82814	87129	ros533	No indel				0
HmGr52	HE667900	82814	87129	ros546	No indel				0	1
										8	0

## Sheet: sugar_receptors_Hcyd
GR gene	Scaffold	GR start	Gr end	Individual	Indel type	Indel depth	Indel start	Indel end	Size	CNV	no-CNV
HmGr4	HE667900	101745	108848	cyd553	No indel				0
HmGr4	HE667900	101745	108848	cyd560	No indel				0
HmGr4	HE667900	101745	108848	cyd564	No indel				0
HmGr4	HE667900	101745	108848	cyd565	No indel				0		1
HmGr5	HE667900	78249	82242	cyd553	No indel				0
HmGr5	HE667900	78249	82242	cyd560	No indel				0
HmGr5	HE667900	78249	82242	cyd564	No indel				0
HmGr5	HE667900	78249	82242	cyd565	No indel				0		1
HmGr6	HE671377	38871	47179	cyd553	No indel				0
HmGr6	HE671377	38871	47179	cyd560	No indel				0
HmGr6	HE671377	38871	47179	cyd564	No indel				0
HmGr6	HE671377	38871	47179	cyd565	No indel				0		1
HmGr7	HE667900	65725	71696	cyd553	No indel				0
HmGr7	HE667900	65725	71696	cyd560	No indel				0
HmGr7	HE667900	65725	71696	cyd564	No indel				0
HmGr7	HE667900	65725	71696	cyd565	No indel				0		1
HmGr8	HE671377	17231	21976	cyd553	No indel				0
HmGr8	HE671377	17231	21976	cyd560	No indel				0
HmGr8	HE671377	17231	21976	cyd564	No indel				0
HmGr8	HE671377	17231	21976	cyd565	No indel				0		1
HmGr9	HE670235	81799	92404	cyd553	No indel				0
HmGr9	HE670235	81799	92404	cyd560	No indel				0
HmGr9	HE670235	81799	92404	cyd564	No indel				0
HmGr9	HE670235	81799	92404	cyd565	No indel				0		1
HmGr45	HE671377	28429	33571	cyd553	No indel				0
HmGr45	HE671377	28429	33571	cyd560	No indel				0
HmGr45	HE671377	28429	33571	cyd564	No indel				0
HmGr45	HE671377	28429	33571	cyd565	No indel				0		1
HmGr52	HE667900	82814	87129	cyd553	No indel				0
HmGr52	HE667900	82814	87129	cyd560	No indel				0
HmGr52	HE667900	82814	87129	cyd564	No indel				0
HmGr52	HE667900	82814	87129	cyd565	No indel				0		1
										0	8

## Sheet: CO2_receptors_Hmel
GR gene	Scaffold	GR start	Gr end	Individual	Indel type	Indel depth	Indel start	Indel end	Size	CNV	no-CNV
HmGr1	HE671488	141511	146400	melPAN1	No indel
HmGr1	HE671488	141511	146400	ag09-108	No indel				0
HmGr1	HE671488	141511	146400	ag09-122	No indel				0
HmGr1	HE671488	141511	146400	ag11-569	No indel				0
HmGr1	HE671488	141511	146400	ag11-572	No indel				0
HmGr1	HE671488	141511	146400	am09-216	No indel				0
HmGr1	HE671488	141511	146400	am11-160	No indel				0
HmGr1	HE671488	141511	146400	am11-293	No indel				0
HmGr1	HE671488	141511	146400	am11-48	No indel				0
HmGr1	HE671488	141511	146400	ros2071	No indel				0
HmGr1	HE671488	141511	146400	ros531	No indel				0
HmGr1	HE671488	141511	146400	ros533	No indel				0
HmGr1	HE671488	141511	146400	ros546	No indel				0		1
HmGr2	HE671241	672400	679349	melPAN1	No indel
HmGr2	HE671241	672400	679349	ag09-108	No indel				0
HmGr2	HE671241	672400	679349	ag09-122	No indel				0
HmGr2	HE671241	672400	679349	ag11-569	No indel				0
HmGr2	HE671241	672400	679349	ag11-572	No indel				0
HmGr2	HE671241	672400	679349	am09-216	No indel				0
HmGr2	HE671241	672400	679349	am11-160	No indel				0
HmGr2	HE671241	672400	679349	am11-293	No indel				0
HmGr2	HE671241	672400	679349	am11-48	No indel				0
HmGr2	HE671241	672400	679349	ros2071	No indel				0
HmGr2	HE671241	672400	679349	ros531	No indel				0
HmGr2	HE671241	672400	679349	ros533	No indel				0
HmGr2	HE671241	672400	679349	ros546	No indel				0		1
HmGr3	HE671897	30088	33356	melPAN1	No indel
HmGr3	HE671897	30088	33356	ag09-108	No indel				0
HmGr3	HE671897	30088	33356	ag09-122	No indel				0
HmGr3	HE671897	30088	33356	ag11-569	No indel				0
HmGr3	HE671897	30088	33356	ag11-572	No indel				0
HmGr3	HE671897	30088	33356	am09-216	No indel				0
HmGr3	HE671897	30088	33356	am11-160	No indel				0
HmGr3	HE671897	30088	33356	am11-293	No indel				0
HmGr3	HE671897	30088	33356	am11-48	No indel				0
HmGr3	HE671897	30088	33356	ros2071	No indel				0
HmGr3	HE671897	30088	33356	ros531	No indel				0
HmGr3	HE671897	30088	33356	ros533	No indel				0
HmGr3	HE671897	30088	33356	ros546	No indel				0		1
									0	0	3

## Sheet: CO2_receptors_Hcyd
GR gene	Scaffold	GR start	Gr end	Individual	Indel type	Indel depth	Indel start	Indel end	CNV	no-CNV	CNV	no-CNV
HmGr1	HE671488	141511	146400	cyd553	No indel					1
HmGr1	HE671488	141511	146400	cyd560	No indel					1
HmGr1	HE671488	141511	146400	cyd564	No indel					1
HmGr1	HE671488	141511	146400	cyd565	No indel					1		1
HmGr2	HE671241	672400	679349	cyd553	No indel					1
HmGr2	HE671241	672400	679349	cyd560	No indel					1
HmGr2	HE671241	672400	679349	cyd564	No indel					1
HmGr2	HE671241	672400	679349	cyd565	No indel					1
HmGr2	HE671241	672400	679349	ros2071	No indel					1		1
HmGr3	HE671897	30088	33356	cyd553	No indel					1
HmGr3	HE671897	30088	33356	cyd560	No indel					1
HmGr3	HE671897	30088	33356	cyd564	No indel					1
HmGr3	HE671897	30088	33356	cyd565	No indel					1		1
										13	0	3

## Sheet: Other_conserved_GRs_Hmel
GR gene	Scaffold	GR start	Gr end	Individual	Indel type	Indel depth	Indel start	Indel end	Size	CNV	noCNV
HmGr44	HE672024	302998	304548	ag09-108	No indel				0
HmGr44	HE672024	302998	304548	ag09-122	No indel				0
HmGr44	HE672024	302998	304548	ag11-569	No indel				0
HmGr44	HE672024	302998	304548	ag11-572	No indel				0
HmGr44	HE672024	302998	304548	am09-216	No indel				0
HmGr44	HE672024	302998	304548	am11-160	No indel				0
HmGr44	HE672024	302998	304548	am11-293	No indel				0
HmGr44	HE672024	302998	304548	am11-48	No indel				0
HmGr44	HE672024	302998	304548	ros2071	No indel				0
HmGr44	HE672024	302998	304548	ros531	No indel				0
HmGr44	HE672024	302998	304548	ros533	No indel				0
HmGr44	HE672024	302998	304548	ros546	No indel				0		1
HmGr46	HE670961	51440	54287	melPAN1	No indel
HmGr46	HE670961	51440	54287	ag09-108	No indel				0
HmGr46	HE670961	51440	54287	ag09-122	No indel				0
HmGr46	HE670961	51440	54287	ag11-569	No indel				0
HmGr46	HE670961	51440	54287	ag11-572	No indel				0
HmGr46	HE670961	51440	54287	am09-216	No indel				0
HmGr46	HE670961	51440	54287	am11-160	No indel				0
HmGr46	HE670961	51440	54287	am11-293	No indel				0
HmGr46	HE670961	51440	54287	am11-48	No indel				0
HmGr46	HE670961	51440	54287	ros2071	No indel				0
HmGr46	HE670961	51440	54287	ros531	No indel				0
HmGr46	HE670961	51440	54287	ros533	No indel				0
HmGr46	HE670961	51440	54287	ros546	No indel				0		1
HmGr54	HE671444	57873	59472	ag09-108	No indel				0
HmGr54	HE671444	57873	59472	ag09-122	No indel				0
HmGr54	HE671444	57873	59472	ag11-569	No indel				0
HmGr54	HE671444	57873	59472	ag11-572	No indel				0
HmGr54	HE671444	57873	59472	am09-216	No indel				0
HmGr54	HE671444	57873	59472	am11-160	No indel				0
HmGr54	HE671444	57873	59472	am11-293	No indel				0
HmGr54	HE671444	57873	59472	am11-48	No indel				0
HmGr54	HE671444	57873	59472	ros2071	No indel				0
HmGr54	HE671444	57873	59472	ros531	No indel				0
HmGr54	HE671444	57873	59472	ros533	No indel				0
HmGr54	HE671444	57873	59472	ros546	No indel				0		1
HmGr63	HE671244	336850	338980	ag09-108	No indel				0
HmGr63	HE671244	336850	338980	ag09-122	No indel				0
HmGr63	HE671244	336850	338980	ag11-569	No indel				0
HmGr63	HE671244	336850	338980	ag11-572	No indel				0
HmGr63	HE671244	336850	338980	am09-216	No indel				0
HmGr63	HE671244	336850	338980	am11-160	No indel				0
HmGr63	HE671244	336850	338980	am11-293	No indel				0
HmGr63	HE671244	336850	338980	am11-48	No indel				0
HmGr63	HE671244	336850	338980	ros2071	No indel				0
HmGr63	HE671244	336850	338980	ros531	No indel				0
HmGr63	HE671244	336850	338980	ros533	No indel				0
HmGr63	HE671244	336850	338980	ros546	No indel				0		1
HmGr66	HE672055	144029	145153	ag09-108	deletion	0.452242	145101	152500	-7399
HmGr66	HE672055	144029	145153	ag09-122	No indel				0
HmGr66	HE672055	144029	145153	ag11-569	No indel				0
HmGr66	HE672055	144029	145153	ag11-572	No indel				0
HmGr66	HE672055	144029	145153	am09-216	No indel				0
HmGr66	HE672055	144029	145153	am11-160	No indel				0
HmGr66	HE672055	144029	145153	am11-293	No indel				0
HmGr66	HE672055	144029	145153	am11-48	No indel				0
HmGr66	HE672055	144029	145153	ros2071	No indel				0
HmGr66	HE672055	144029	145153	ros531	No indel				0
HmGr66	HE672055	144029	145153	ros533	No indel				0
HmGr66	HE672055	144029	145153	ros546	No indel				0	1
HmGr68	HE671241	397172	399528	ag09-108	No indel				0
HmGr68	HE671241	397172	399528	ag09-122	No indel				0
HmGr68	HE671241	397172	399528	ag11-569	No indel				0
HmGr68	HE671241	397172	399528	ag11-572	No indel				0
HmGr68	HE671241	397172	399528	am09-216	No indel				0
HmGr68	HE671241	397172	399528	am11-160	No indel				0
HmGr68	HE671241	397172	399528	am11-293	No indel				0
HmGr68	HE671241	397172	399528	am11-48	No indel				0
HmGr68	HE671241	397172	399528	ros2071	No indel				0
HmGr68	HE671241	397172	399528	ros531	No indel				0
HmGr68	HE671241	397172	399528	ros533	No indel				0
HmGr68	HE671241	397172	399528	ros546	No indel				0		1
										1	5

## Sheet: Other_conserved_Grs_Hcyd
GR gene	Scaffold	GR start	Gr end	Individual	Indel type	Indel depth	Indel start	Indel end	CNV	noCNV
HmGr44	HE672024	302998	304548	cyd553	No indel
HmGr44	HE672024	302998	304548	cyd560	No indel
HmGr44	HE672024	302998	304548	cyd564	No indel
HmGr44	HE672024	302998	304548	cyd565	No indel					1
HmGr46	HE670961	51440	54287	cyd553	No indel
HmGr46	HE670961	51440	54287	cyd560	No indel
HmGr46	HE670961	51440	54287	cyd564	No indel
HmGr46	HE670961	51440	54287	cyd565	No indel					1
HmGr54	HE671444	57873	59472	cyd553	No indel
HmGr54	HE671444	57873	59472	cyd560	No indel
HmGr54	HE671444	57873	59472	cyd564	No indel
HmGr54	HE671444	57873	59472	cyd565	No indel					1
HmGr63	HE671244	336850	338980	cyd553	No indel
HmGr63	HE671244	336850	338980	cyd560	No indel
HmGr63	HE671244	336850	338980	cyd564	No indel
HmGr63	HE671244	336850	338980	cyd565	No indel					1
HmGr66	HE672055	144029	145153	cyd553	No indel
HmGr66	HE672055	144029	145153	cyd560	No indel
HmGr66	HE672055	144029	145153	cyd564	No indel
HmGr66	HE672055	144029	145153	cyd565	No indel					1
HmGr68	HE671241	397172	399528	cyd553	No indel
HmGr68	HE671241	397172	399528	cyd560	No indel
HmGr68	HE671241	397172	399528	cyd564	No indel
HmGr68	HE671241	397172	399528	cyd565	No indel					1
									0	6
